# Differential impact of self and environmental antigens on the ontogeny and maintenance of CD4<sup>+</sup> T cell memory

Thea Hogan<sup>1†</sup>, Maria Nowicka<sup>2†</sup>, Daniel Cownden<sup>3</sup>, Claire Pearson<sup>4</sup>, Andrew J. Yates<sup>2\*‡</sup>, Benedict Seddon<sup>1\*‡</sup>

**\*For correspondence:**

[andrew.yates@columbia.edu](mailto:andrew.yates@columbia.edu) (AJY);  
[benedict.seddon@ucl.ac.uk](mailto:benedict.seddon@ucl.ac.uk) (BS)

<sup>†</sup>These authors contributed equally to this work

<sup>‡</sup>These authors also contributed equally to this work

<sup>1</sup>Institute of Immunity and Transplantation, Division of Infection and Immunity, UCL, Royal Free Hospital, Rowland Hill Street, London NW3 2PF, United Kingdom; <sup>2</sup>Department of Pathology and Cell Biology, Columbia University Medical Center, 701 West 168th Street, New York, NY 10032, USA; <sup>3</sup>Institute of Infection, Immunity and Inflammation, University of Glasgow, Glasgow G3 8TA, United Kingdom; <sup>4</sup>Kennedy Institute of Rheumatology, University of Oxford, Roosevelt Drive, Headington, Oxford OX3 7FY, United Kingdom

---

**Abstract** Laboratory mice develop populations of circulating memory CD4<sup>+</sup> T cells in the absence of overt infection. We have previously shown that these populations are replenished from naive precursors at high levels throughout life (Gossel et al., 2017). However, the nature, relative importance and timing of the forces generating these cells remain unclear. Here, we tracked the generation of memory CD4<sup>+</sup> T cell subsets in mice housed in facilities differing in their 'dirtiness'. We found evidence for sequential naive to central memory to effector memory development, and confirmed that both memory subsets are heterogeneous in their rates of turnover. We also inferred that early exposure to self and environmental antigens establishes persistent memory populations at levels determined largely, though not exclusively, by the dirtiness of the environment. After the first few weeks of life, however, these populations are continuously supplemented by new memory cells at rates that are independent of environment.

---

## Introduction

Conventional memory T cells are defined as lymphocytes which respond rapidly upon re-encounter with previously-encountered epitopes (Gourley et al., 2004; Kaech and Wherry, 2007). In mice, memory T cells exhibit considerable heterogeneity in their function, circulation patterns, response to re-challenge, and capacities for proliferative self-renewal and survival (Farber, 2000; Kaech and Wherry, 2007; Jameson and Masopust, 2009; Gossel et al., 2017). This phenotypic heterogeneity is reflected in differential expression of various cell-surface molecules. In uninfected naive mice, there are at least two distinct populations of recirculating cells distinguished by their expression of the lymph node homing receptor L-selectin (CD62L); CD44<sup>hi</sup> CD62L<sup>-</sup> effector memory (T<sub>EM</sub>) and CD44<sup>hi</sup> CD62L<sup>+</sup> central memory (T<sub>CM</sub>) cells. During immune responses to active infection, there is an even more complex mix of effector and memory intermediates (Jameson and Masopust, 2018).

While it is clear that memory to infection resides amongst these CD44<sup>hi</sup> subsets, it is also evident that they are generated in naive mice in the absence of overt infection. The functional significance of these memory-phenotype (MP) CD4<sup>+</sup> T cells is not fully understood, but there is evidence they

40 can augment primary immune responses. They can facilitate rapid production of IFN- $\gamma$  during the  
41 early inflammatory phase of the immune response to *Toxoplasma gondii* infection and enhance  
42 T<sub>H</sub>1-type CD4<sup>+</sup> T cell responses later in infection (*Kawabe et al., 2017*). There is also evidence that  
43 MP cells are capable of making rapid cross-reactive responses during primary infections (*Min and*  
44 *Paul, 2005*). Given that MP cells represent the majority of the memory compartment in specific  
45 pathogen-free (SPF) mice (*Kawabe et al., 2017*), a better understanding of how these cells are  
46 generated and maintained is crucial for better understanding their function and impact upon  
47 conventional memory to defined challenges.

48 The precise nature of the forces driving the generation of MP cells remains unclear. Their devel-  
49 opment appears to require a TCR-mediated activation event; Cd28<sup>-/-</sup> mice have greatly reduced  
50 numbers of MP populations (*Kotani et al., 2006*), and mice lacking canonical NF- $\kappa$ B signalling, an ob-  
51 ligate pathway in T cell activation, are completely devoid of such cells (*Webb et al., 2019*). Whether  
52 the TCR stimuli derive from self or foreign recognition events is unknown. MP cell generation  
53 may reflect a stochastic process in which CD4<sup>+</sup> naive T cells occasionally encounter homeostatic  
54 stimuli that are above an activation threshold (*Sprent and Surh, 2011*), and indeed MP cells are  
55 generated not only in lymphopenia but also constitutively under replete conditions throughout  
56 life (*Gossel et al., 2017; Kawabe et al., 2017*). There is a positive correlation between the affinity of  
57 naive CD4<sup>+</sup> T cells to self-antigens and the potential for differentiating into MP cells (*Kawabe et al.,*  
58 *2017*), although self-reactivity is also positively correlated to reactivity to foreign antigens (*Mandl*  
59 *et al., 2013*). Stronger evidence supporting an autoreactive stimulus comes from the failure of  
60 broad-spectrum antibiotics to prevent conversion of naive T cells to MP cells following adoptive  
61 transfer in vivo, and the observation that mice raised in germ free conditions contain similar  
62 numbers of MP cells as those in SPF conditions (*Kawabe et al., 2017*). However, there is also a  
63 role for foreign environmental antigen in generating T cell memory compartments, since mice  
64 raised in more antigenically diverse environments, but still in the absence of overt infection, exhibit  
65 larger peripheral memory CD8<sup>+</sup> T cell pools than SPF mice (*Beura et al., 2016*). When exactly such  
66 environmental stimuli impact upon memory compartment development, or how foreign and self  
67 reactivity combine to form the memory compartments, is unknown.

68 The differentiation pathways of these MP cells are also poorly understood. They may derive  
69 either directly from naive T cells or through interconversion of other memory phenotypes. Amongst  
70 CD8 cells, there is evidence that some MP subpopulations are generated in the thymus (*Lee et al.,*  
71 *2011*). In the case of CD4<sup>+</sup> lineage cells, it has been suggested that MP CD4<sup>+</sup> T cells derive from  
72 peripheral naive phenotype cells in a thymus-independent fashion (*Kawabe et al., 2017*). While  
73 both CD4<sup>+</sup> T<sub>CM</sub> and T<sub>EM</sub> are produced constitutively in adult mice (*Gossel et al., 2017*), it remains  
74 unclear how their differentiation patterns relate to those of classically antigen-stimulated naive T  
75 cells.

76 In this study we aimed to characterise the development and maintenance of memory CD4<sup>+</sup> T  
77 cell subsets in adult mice to identify the nature and timing of the signals driving these dynamics in  
78 the absence of overt infection. To do this we quantified the homeostasis and ontogeny of memory  
79 CD4<sup>+</sup> T cells in identical strains of mice raised in two different animal facilities with distinct caging  
80 environments; those housed in individually ventilated cages (IVCs) and fed irradiated water, and  
81 those fed untreated tap water and housed in open cages, who might consequently be exposed  
82 to a greater variety of environmental antigens. We made use of an established temporal fate-  
83 mapping model in both cohorts, which allowed us to track the development of T cells under replete  
84 conditions (*Hogan et al., 2015; Gossel et al., 2017*). We also used data from germ-free (GF) mice to  
85 dissect further the relative contributions of self and environmental antigens to the generation and  
86 maintenance of MP cells.

## 87 Results

### 88 Modelling the ontogeny and homeostasis of CD4<sup>+</sup> MP T cell subsets

89 We employed a system described previously (*Hogan et al., 2015; Gossel et al., 2017*) to examine  
90 the flow of cells into memory subsets (Figure 1A). Briefly, CD45.1<sup>+</sup> C57Bl6/SJL host mice of various  
91 ages were treated with optimised doses of the transplant conditioning drug busulfan to selectively  
92 deplete haematopoietic stem cells (HSC). The HSC compartment was then reconstituted by bone  
93 marrow transplantation (BMT) with congenically labelled bone marrow from CD45.2<sup>+</sup> C57Bl6/J  
94 donors. The progeny of donor HSC were then followed as they developed in the thymus and  
95 percolated into the peripheral T cell pools, initially replete with host-derived cells. Total numbers of  
96 CD4<sup>+</sup> naive T cells and T<sub>CM</sub> and T<sub>EM</sub> cells in these busulfan chimeric mice were normal, in comparison  
97 to untreated wild-type (WT) controls (Figure 1–figure supplement 1), confirming that the busulfan  
98 treatment regime left peripheral compartments intact (*Hogan et al., 2015; Gossel et al., 2017*). The  
99 kinetics with which donor-derived cells infiltrate the peripheral compartments – first naive, and then  
100 memory subsets – are rich in information regarding developmental pathways, rates of turnover  
101 and differentiation of lymphocyte populations, and any heterogeneity in homeostatic dynamics  
102 within them (*Hogan et al., 2015; Gossel et al., 2017; Rane et al., 2018*).

103 We studied busulfan chimeric mice from two housing facilities that employed different levels of  
104 mouse containment. At the MRC National Institute for Medical Research (NIMR), mice were held in  
105 open cages and fed untreated tap water, while mice held at the UCL Comparative Biology Unit (UCL)  
106 were maintained in individually ventilated cages (IVCs) and fed irradiated water. Henceforth we  
107 refer to UCL sourced mice as ‘clean’ and NIMR sourced mice as ‘dirty’, in reference to the presumed  
108 difference in health status of the mice. We use these terms for clarity, but emphasise that they  
109 are relative; mice co-housed with pet-store or feral mice would be expected to be substantially  
110 ‘dirtier’ (*Beura et al., 2016*), and those in turn are cleaner than truly feral mice. In both environments,  
111 the same C57Bl6/SJL strain was analysed by the same researcher and cells were enumerated using  
112 the same single CASY counter. In mice aged 10 weeks and older, the numbers of CD4<sup>+</sup> naive T cells  
113 in mice from clean and dirty environments were broadly similar (Figure 1B, left panel). The total  
114 sizes (host+donor) of all circulating memory CD4<sup>+</sup> T cell subsets remained relatively stable over the  
115 time frame of analysis, but were already significantly larger in dirty mice (Figure 1B, right panels) at  
116 age 10 weeks. Following BMT, donor-derived memory T cells accumulated in similar numbers in  
117 the two environments (Figure 1C). Therefore, these two observations result in a lower proportional  
118 replacement of pre-existing memory cells with donor memory cells in dirty mice (Figure 1D).

119 To quantify the cellular processes underlying these kinetics, we first considered a simple mecha-  
120 nistic explanation shown schematically in Figure 2A. In this ‘homogeneous’ model, each memory  
121 population (CD4<sup>+</sup> T<sub>CM</sub> or T<sub>EM</sub>) is fed at a constant *per capita* rate from a precursor population  
122 (source). We refer to this rate as the force of recruitment,  $\varphi$ . The total cellular flux into memory  
123 per day is then  $\varphi$  multiplied by the size of the source population, which in principle could be CD4<sup>+</sup>  
124 naive T cells, or the complementary memory population. We assume that memory cells are then  
125 lost at a constant net *per capita* rate  $\lambda$  which is the balance of loss (turnover) and proliferative  
126 self-renewal. In particular, the ‘clonal half-life’  $\ln(2)/\lambda$  is the average time taken for a population that  
127 undergoes any degree of self-renewal to halve in size, and may be much longer than the lifespan of  
128 any particular cell within it.

129 We also considered a ‘two phase’ model of memory dynamics (Figure 2B), which was motivated  
130 by three observations. First, newly-generated donor CD4<sup>+</sup> T<sub>CM</sub> and T<sub>EM</sub> in busulfan chimeras express  
131 Ki67, a marker of recent cell division, at higher levels than their established host-derived coun-  
132 terparts for some time after BMT (*Gossel et al., 2017*), although these levels eventually converge  
133 (data not shown). These observations suggest that memory CD4<sup>+</sup> T cell populations become less  
134 proliferative, on average, with time since entry into the compartment. Second, we previously found  
135 evidence, using BrdU labelling in WT mice, that both CD4<sup>+</sup> T<sub>EM</sub> and T<sub>CM</sub> appear to be kinetically  
136 heterogeneous, with at least two subpopulations turning over and dividing at different rates (*Gossel*

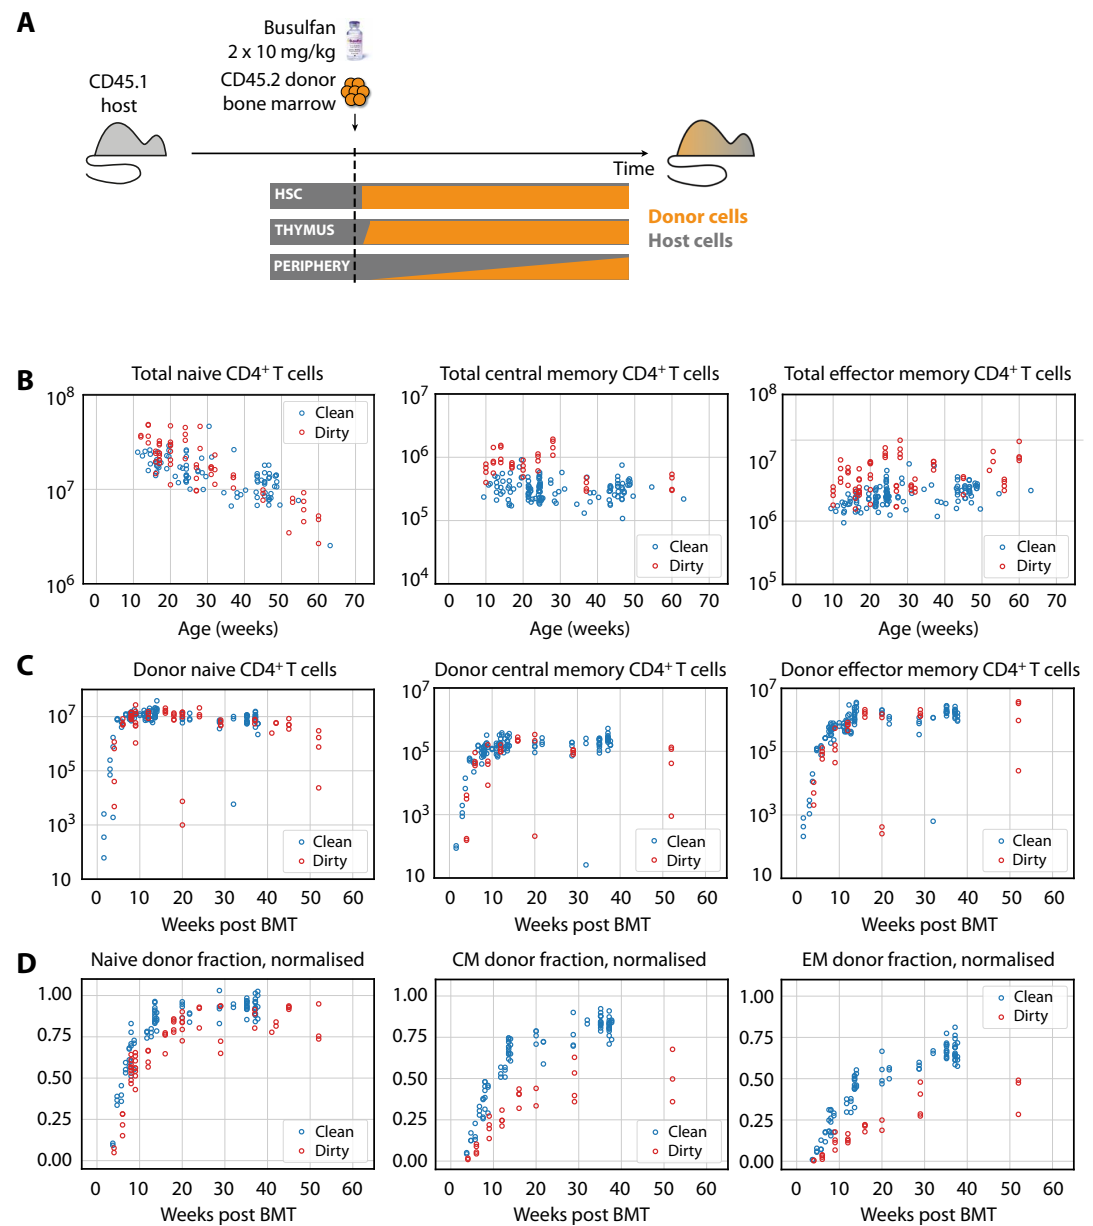

**Figure 1. (A)** Generating bone marrow chimeras to map T cell homeostasis. Donor T cells (orange) differentiate and percolate through the thymus and periphery, replacing host cells (grey). **(B)** Comparing total numbers of CD4<sup>+</sup> naive, T<sub>CM</sub> and T<sub>EM</sub> cells in clean and dirty chimeric mice. **(C)** Numbers of donor-derived CD4<sup>+</sup> subsets recovered from spleen and lymph nodes of clean and dirty chimeric mice. Bone marrow transplants (BMT) were performed in mice between ages 5-26 weeks. **(D)** The donor fraction (chimerism) within CD4<sup>+</sup> T cell subsets, varying with time post BMT, normalised to the chimerism in the double-positive thymocytes in each mouse.

137 *et al., 2017*). Third, and consistent with this picture, the increases in donor chimerism that we  
138 observed in both  $T_{CM}$  and  $T_{EM}$  with time post-BMT were suggestive of a biphasic kinetic, with a  
139 relatively rapid accumulation of donor cells followed by a slower increase (Figure 1D). As shown  
140 in Methods and Materials, the rate of accumulation of new memory cells is dictated by both the  
141 dynamics of influx and the net loss rate of existing memory,  $\lambda$ . Therefore, all three observations  
142 are consistent with a mechanism in which cells newly recruited into memory comprise a subpop-  
143 ulation that both divides rapidly and has a high net loss rate  $\lambda_{fast}$ . These cells then transition to  
144 a more quiescent state that divides more slowly and also has a lower net loss rate,  $\lambda_{slow} < \lambda_{fast}$   
145 (Figure 2B). The transient differences in Ki67 expression in donor and host memory cells could  
146 then be explained by an enrichment for ‘new’ memory (donor cells) in the fast phase in the weeks  
147 immediately following BMT, and not by any intrinsic differences in the behaviour of donor and host  
148 cells. Further, this transient difference in Ki67 expression implies a linear flow from fast to slow,  
149 rather than a branched process of establishment of the two populations separately; in the latter  
150 case, we would expect no differences in Ki67 expression between host and donor cells at any time.

151 While the two-phase model is perhaps a minimal description of these observations, it seems  
152 plausible that any transition from active to quiescent memory might be more continuous. We  
153 previously found evidence for smooth changes in the rates of division and/or loss of naive T cells  
154 with their post-thymic age (*Rane et al., 2018*). We therefore also considered a model in which  
155 the net loss rate  $\lambda$  of a cohort of cells changes continuously with the time since their common  
156 ancestor entered memory,  $a$  (the ‘age-dependent loss model’, Figure 2C). While the observations  
157 above are most consistent with  $\lambda_{slow} < \lambda_{fast}$ , or a decreasing  $\lambda(a)$ , when fitting the two-phase and  
158 age-dependent loss models we placed no constraints on their parameters and allowed the data to  
159 determine their values. When analysing the age-dependent loss model we explored a variety of  
160 forms for  $\lambda(a)$  (see Methods and Materials).

161 Finally, we considered an alternative form of heterogeneity in memory, in which subpopulations  
162 of  $CD4^+$   $T_{CM}$  and  $T_{EM}$  generated early in life persist and are not replenished by newer cells (*Gos-  
163 sel et al. (2017)*; Figure 2D). These ‘incumbent memory’ populations, assumed to be stable in numbers  
164 and entirely host-derived (that is, established before 5 weeks of age, the earliest age at BMT in this  
165 study), could naturally explain the limited donor chimerism within memory subsets and, if they  
166 are less dynamic than memory generated later in life, might also be able to explain host/donor  
167 differences in Ki67 expression.

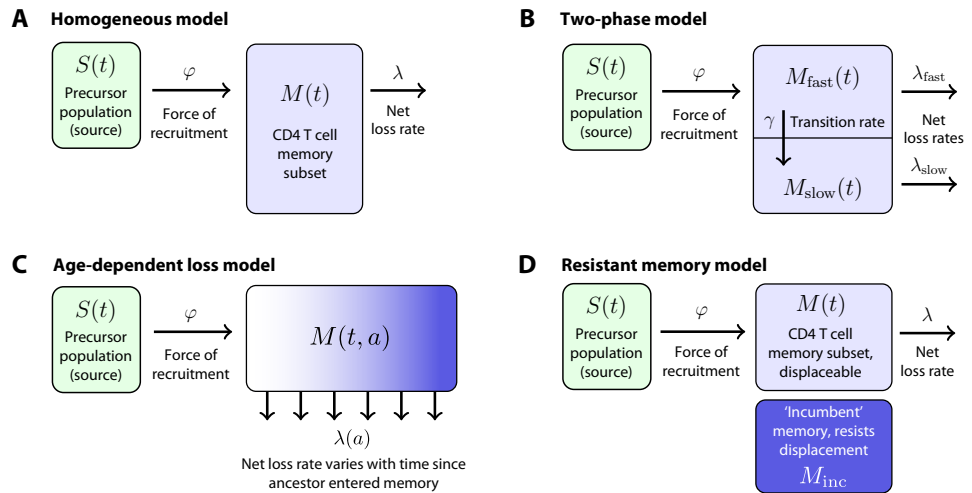

**Figure 2. Models of the generation and maintenance of memory CD4<sup>+</sup> T cell subsets in adult mice. (A)** New cells from a precursor (source) population of size  $S(t)$  flow in to a homogeneous memory subset  $M(t)$  at total rate  $\varphi S(t)$ . The force of recruitment  $\varphi$  is approximately the daily probability that any given cell from the source will be recruited into memory, multiplied by an expansion factor. This memory population may self-renew through division and be lost through death or differentiation, and is continually supplemented by cells from the source. We assume that the net loss rate (loss minus division) is a constant,  $\lambda$ . **(B)** In a two-phase model of memory, new cells are recruited at rate  $\varphi S(t)$  into a population  $M_{fast}(t)$  that has a high net loss rate  $\lambda_{fast}$  and so is replaced by donor cells relatively quickly. These cells transition into a slower subset  $M_{slow}(t)$  at constant rate  $\gamma$  and are then lost at net rate  $\lambda_{slow} < \lambda_{fast}$ . **(C)** The age-dependent loss model; here, the net loss rate of memory is a continuous function of cell 'age'  $a$ , defined as the time since a cell or its ancestor entered the memory pool. The model tracks the evolution of the population density of memory T cells of age  $a$  at total age  $t$ ,  $M(t, a)$ . **(D)** The resistant memory model invokes a subpopulation of 'incumbent' memory cells which are presumed to be established early in life, stable in numbers, and not replenished from the source population. As in the homogeneous model, the source feeds a compartment of 'displaceable' cells, with net loss rate  $\lambda$ .

168 **The kinetics of accumulation of CD4<sup>+</sup> MP cells are consistent with a naive → T<sub>CM</sub> →**  
 169 **T<sub>EM</sub> pathway, and both memory subsets are heterogeneous in their turnover**

170 We compared the abilities of the four mechanisms to describe the replacement kinetics of memory  
 171 subsets in the dirty and clean environments. The kinetic of donor chimerism in CD4<sup>+</sup> T<sub>EM</sub> clearly  
 172 lagged that of CD4<sup>+</sup> T<sub>CM</sub> (Figure 1D), ruling out T<sub>EM</sub> as a direct predictor of T<sub>CM</sub> accumulation. We  
 173 therefore considered only naive T cells as the source for T<sub>CM</sub>, but considered both naive and T<sub>CM</sub>  
 174 cells as potential sources of T<sub>EM</sub>.

175 For each combination of source, environment (clean/dirty), and subset (T<sub>EM</sub>/T<sub>CM</sub>), we fitted each  
 176 model simultaneously to the timecourses of the total cell numbers and the proportion of donor  
 177 cells within the subset using a maximum likelihood approach. We then calculated the combined  
 178 probabilities (joint likelihoods) that the replacement kinetics of a given subset in both clean and  
 179 dirty environments derive from each combination of source and model, allowing for different  
 180 parameters in clean and dirty mice. We then compared the support for each combination using  
 181 the Akaike Information Criterion (Table 1, values in bold). Details of the model formulation, model  
 182 fitting and inference procedures are given in Methods and Materials.

183 We found clearly stronger support for T<sub>CM</sub> cells rather than naive T cells as a predictor of T<sub>EM</sub>  
 184 production (Table 1). This conclusion contrasts with that of our earlier study (*Gossel et al., 2017*),  
 185 which found evidence for a direct naive → T<sub>EM</sub> transition; however, while these inferences may be  
 186 model-dependent to some extent, the more detailed timecourses we studied here gave us greater  
 187 power to discriminate between the two pathways.

188 We found almost no support for the homogeneous or resistant memory models. For T<sub>CM</sub> the  
 189 age-dependent loss was strongly favoured statistically, while for T<sub>EM</sub> the two-phase model had  
 190 the strongest support (fits shown in Figure 3). However the two models gave visually very similar  
 191 descriptions of each dataset (not shown). This similarity is perhaps unsurprising, as both describe a  
 192 progressive increase in clonal persistence the longer cells or their progeny reside within memory.  
 193 Therefore, we remain somewhat equivocal regarding the true nature of heterogeneity in each, and  
 194 present parameter estimates below for both models (Table 2). A robust conclusion, however, is that  
 195 we find a progressive lengthening of clonal lifetimes in both memory subsets and environments,  
 196 with newly recruited memory being lost on timescales of days to weeks, and more established  
 197 memory persisting for several months (Figure 4).

| Model              | Parameters | CD4 <sup>+</sup> central memory |                 | CD4 <sup>+</sup> effector memory |                                 |
|--------------------|------------|---------------------------------|-----------------|----------------------------------|---------------------------------|
|                    |            | Source population               |                 | Source population                |                                 |
|                    |            | CD4 <sup>+</sup> naive          |                 | CD4 <sup>+</sup> naive           | CD4 <sup>+</sup> central memory |
| Homogeneous        | 3          | <b>128</b> (10)                 | <b>89</b> (75)  | <b>160</b> (39)                  |                                 |
| Two-phase          | 5          | <b>9</b> (74)                   | <b>29</b> (109) | <b>0</b> (124)                   |                                 |
| Age-dependent loss | 4          | <b>0</b> (76)                   | <b>29</b> (107) | <b>10</b> (117)                  |                                 |
| Resistant memory   | 4          | <b>26</b> (63)                  | <b>45</b> (99)  | <b>49</b> (97)                   |                                 |

**Table 1.** Measures of support (using differences in the corrected Akaike information criterion, AICc - AICc<sub>min</sub>; see Methods and Materials) for models in which CD4<sup>+</sup> T<sub>CM</sub> derive directly from CD4<sup>+</sup> naive T cells, and T<sub>EM</sub> derive either from naive T cells or T<sub>CM</sub>. AICc differences are shown in bold, with zero indicating the model with strongest support positive differences representing reduced support, with differences of 10 or more generally considered highly significant. Figures in parentheses are the log likelihoods, reflecting the quality of fit of each model. Indicated are the number of parameters estimated for each model in each environment.

198 **Constitutive generation of circulating CD4<sup>+</sup> T<sub>EM</sub> and T<sub>CM</sub> cells in adult mice occurs**  
 199 **at constant rates, irrespective of environment**

200 The kinetics of accumulation of donor-derived memory cells were visually indistinguishable in  
 201 the two environments from age 10 weeks onwards (Figure 1C), suggesting similar net rates of



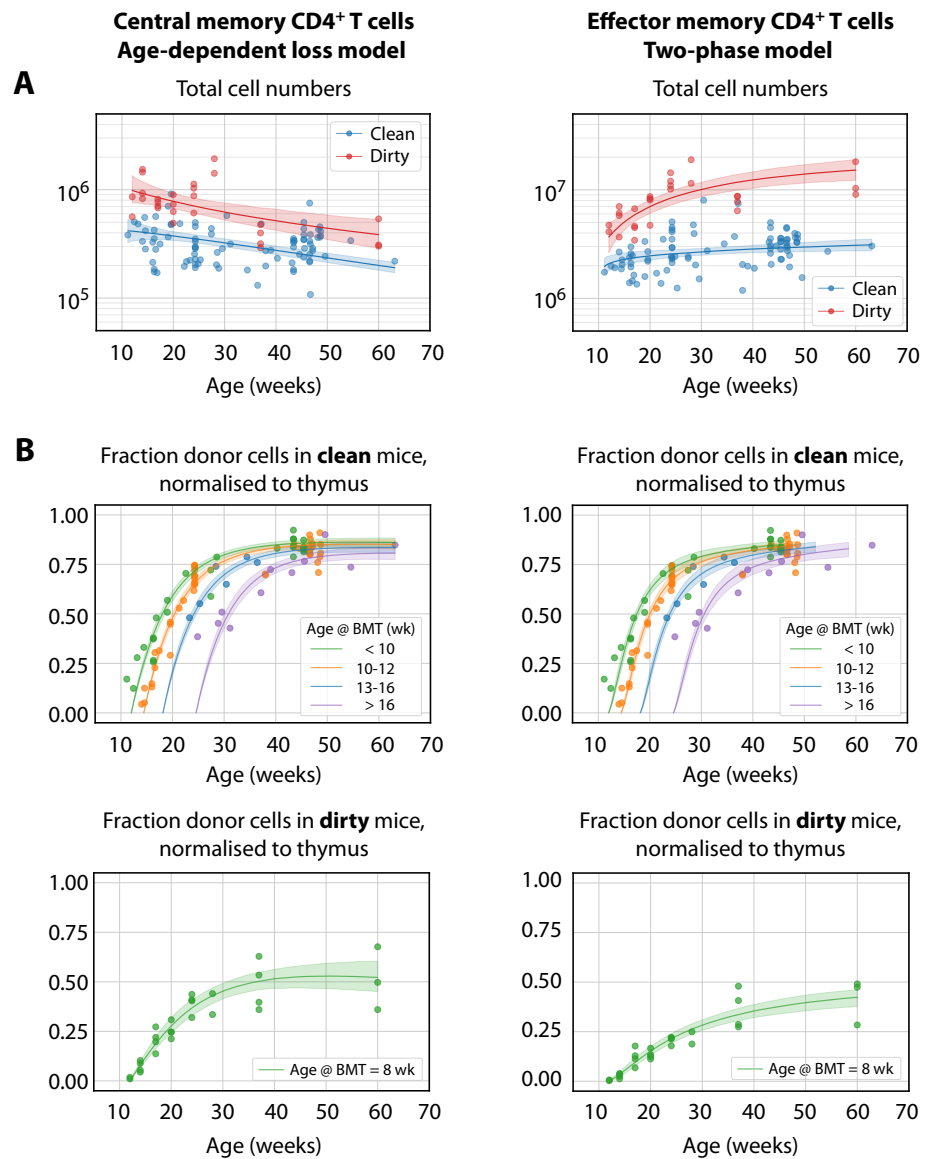

**Figure 3. The best-fitting models of CD4<sup>+</sup> MP T cell dynamics.** The age-dependent loss model was the best description of CD4<sup>+</sup> T<sub>CM</sub> dynamics, and the two-phase model best described T<sub>EM</sub>. **(A)** Total (donor+host) numbers of memory T cells and **(B)** chimerism, from 4 weeks post bone marrow transplant (BMT). To visualise the fits, clean facility mice were grouped into small ranges of age at BMT, and the four curves show the model predictions for the median age within each group. All trajectories are described with the same parameters, differing only in the kinetics of the source population, which is age-dependent. The lower panels show the fitted trajectories of CD4<sup>+</sup> T<sub>CM</sub> and T<sub>EM</sub> chimerism in mice in the dirty environment, all of which underwent BMT at a similar age.



202 recruitment and loss. Consistent with this observation, we found no significant differences between  
 203 clean and dirty mice in the forces of recruitment ( $\varphi$ ) into circulating CD4<sup>+</sup> memory T cell subsets  
 204 between the ages of 11-64 weeks, in either model, and no substantial differences in their rates of  
 205 loss (Figure 4 and Table 2). Therefore, we infer that antigenic stimuli common to both environments  
 206 drive the continuous generation of new CD4<sup>+</sup> effector and central memory T cells in adult mice, at  
 207 total rates that are proportional to the sizes of their precursor populations.

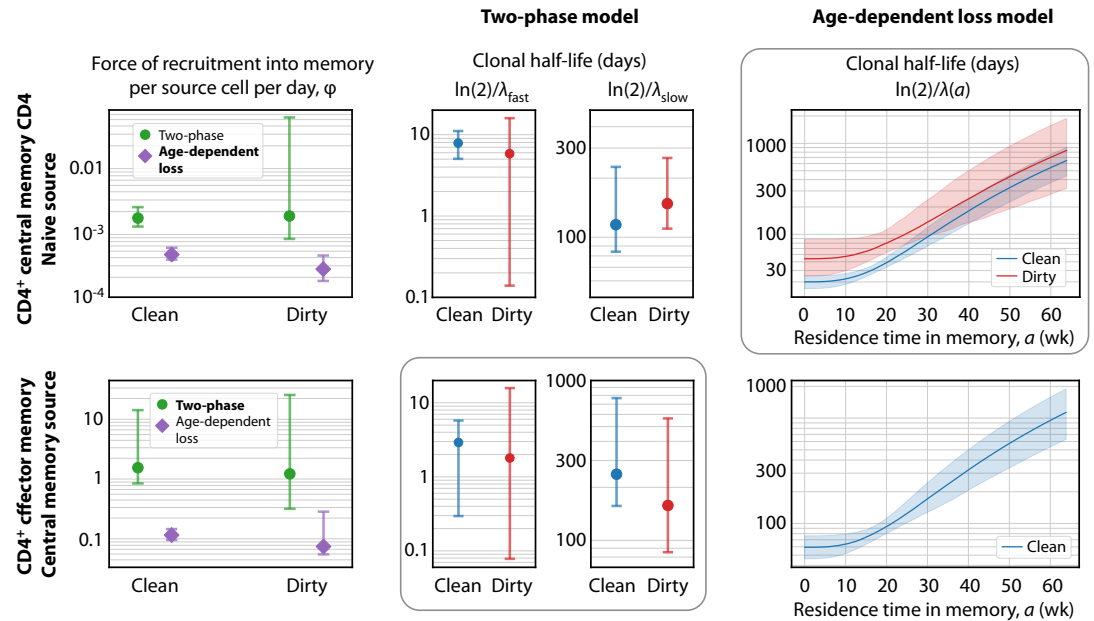

**Figure 4. Key parameters describing the constitutive production of central and effector memory CD4<sup>+</sup> T cells in adult mice.** **Left panels:** Estimates of the force of recruitment from the source ( $\varphi$ ) for each model and each population. Vertical bars represent bootstrapped 95% confidence intervals. The favoured model for each population is indicated in bold in the legend. **Middle panels:** The estimated clonal half-lives of fast and slow memory in the two-phase model. The enclosing box indicates that this model was favoured for T<sub>EM</sub>. **Right panels:** Estimates of the clonal half-lives, which vary with cell age, derived from the age-dependent loss model, favoured for T<sub>CM</sub>. For T<sub>EM</sub> in dirty mice, the estimated  $\lambda(a)$  was close to zero and the clonal half-life is not shown. Shaded bands indicate the range of predicted half-lives arising from the 95% confidence intervals on  $\lambda(a)$ . All parameter estimates are given in Table 2.

## 208 Quantifying the long-term dynamics of CD4<sup>+</sup> MP T cell subsets

209 Our analyses give a quantitative picture of recruitment into memory and the cells' subsequent  
 210 life-histories, and allow us to identify features of their population dynamics that are common to  
 211 both environments and model-independent. First, the donor chimerism in T<sub>CM</sub> reached substantially  
 212 lower levels than the CD4<sup>+</sup> naive T cell precursors (Figure 1D), suggesting that the rate of generation  
 213 of new memory in both environments wanes with age, and/or that more established memory has a  
 214 competitive advantage over recently recruited cells. We find evidence for both processes here. We  
 215 show in Methods and Materials that if influx declines faster than the average rate of turnover, a  
 216 population will be unable to reach the same level of chimerism as its precursor – in effect, the flow  
 217 from the source ‘dries up’ more quickly than the memory cells can be replaced by immigrants. We  
 218 see signs of this effect; due to thymic involution, CD4<sup>+</sup> naive T cell numbers decay exponentially in  
 219 both clean and dirty adult mice (Figure 1B) with population half lives of 228 days (95% CI 227-231  
 220 days) and 143 (142-144) days respectively. These timescales are comparable to or shorter than  
 221 the estimated half lives of established T<sub>CM</sub> memory clones ( $\ln(2)/\lambda_{\text{slow}}$  in the two-phase model; and  
 222  $\ln(2)/\lambda(a)$  for  $a > 30$  weeks in the age-dependent loss model; Figure 4 and Table 2). In addition,  
 223 both the two-phase and age-dependent models indicate that older memory clones have a fitness

| Model                            | Parameter                                       | Quantity                              | CD4 <sup>+</sup> T <sub>CM</sub>     |                                      | CD4 <sup>+</sup> T <sub>EM</sub>   |                                    |
|----------------------------------|-------------------------------------------------|---------------------------------------|--------------------------------------|--------------------------------------|------------------------------------|------------------------------------|
|                                  |                                                 |                                       | Clean                                | Dirty                                | Clean                              | Dirty                              |
| <b>Two-phase</b>                 | Force of recruitment (d <sup>-1</sup> )         | $\varphi$                             | 1.4 (1.2, 2.3) × 10 <sup>-3</sup>    | 1.5 (0.77, 54) × 10 <sup>-3</sup>    | 1.2 (0.76, 12)                     | 1.1 (0.29, 23)                     |
|                                  | Daily cell influx at age $t^* = 20$ wk          | $\varphi S(t^*)$                      | 2.3 (2.0, 3.9) × 10 <sup>4</sup>     | 3.2 (1.7, 120) × 10 <sup>4</sup>     | 36 (22, 370) × 10 <sup>4</sup>     | 84 (21, 1700) × 10 <sup>4</sup>    |
|                                  | Net loss rate of fast subset (d <sup>-1</sup> ) | $\lambda_{fast}$                      | 0.082 (0.063, 0.14)                  | 0.103 (0.043, 5.2)                   | 0.23 (0.12, 2.4)                   | 0.39 (0.045, 9.0)                  |
|                                  | Net loss rate of slow subset (d <sup>-1</sup> ) | $\lambda_{slow}$                      | 5.9 (3.01, 9.4) × 10 <sup>-3</sup>   | 4.8 (2.7, 6.9) × 10 <sup>-3</sup>    | 2.5 (0.81, 4.6) × 10 <sup>-3</sup> | 4.8 (1.01, 8.8) × 10 <sup>-3</sup> |
|                                  | Clonal half-life of fast subset (d)             | $\ln(2)/\lambda_{fast}$               | 8.4 (5.04, 11)                       | 6.7 (0.14, 16)                       | 3.02 (0.30, 5.8)                   | 1.8 (0.078, 16)                    |
|                                  | Clonal half-life of slow subset (d)             | $\ln(2)/\lambda_{slow}$               | 120 (75, 230)                        | 140 (101, 260)                       | 270 (150, 770)                     | 140 (75, 570)                      |
|                                  | % of memory transitioning to slow               | $100\gamma/(\lambda_{fast} + \gamma)$ | 3.4 (0.46, 4.1)                      | 5.0 (0.18, 10)                       | 1.8 (0.21, 2.4)                    | 9.1 (0.36, 38)                     |
| Proportion slow at $t^* = 20$ wk | $M_{slow}(t^*)/M(t^*)$                          | 0.25 (0.12, 0.30)                     | 0.61 (0.45, 0.75)                    | 0.36 (0.25, 0.41)                    | 0.72 (0.41, 0.87)                  |                                    |
| <b>Age-dependent loss</b>        | Force of recruitment (d <sup>-1</sup> )         | $\varphi$                             | 0.43 (0.38, 0.57) × 10 <sup>-3</sup> | 0.26 (0.18, 0.43) × 10 <sup>-3</sup> | 0.10 (0.086, 0.13)                 | 0.062 (0.049, 0.26)                |
|                                  | Daily cell influx at age $t^* = 20$ wk          | $\varphi S(t^*)$                      | 0.70 (0.62, 0.93) × 10 <sup>4</sup>  | 0.57 (0.39, 0.96) × 10 <sup>4</sup>  | 3.04 (2.5, 3.8) × 10 <sup>4</sup>  | 4.6 (3.7, 19) × 10 <sup>4</sup>    |
|                                  | Net loss rate of new memory (d <sup>-1</sup> )  | $\lambda_0$                           | 2.2 (2.0, 2.7) × 10 <sup>-2</sup>    | 1.2 (0.79, 2.0) × 10 <sup>-2</sup>   | 1.2 (0.91, 1.5) × 10 <sup>-2</sup> | 1.1 (-44, 26) × 10 <sup>-5</sup>   |
|                                  | Memory age threshold <sup>†</sup> (d)           | $A$                                   | 150 (140, 200)                       | 190 (130, 310)                       | 150 (130, 230)                     | NA                                 |

**Table 2. Estimates of parameters governing CD4<sup>+</sup> T<sub>CM</sub> and T<sub>EM</sub> homeostasis in adult mice.** 95% confidence intervals are shown in parentheses. <sup>†</sup>In the age-dependent loss model, the threshold cell age  $A$  defines the beginning of the more persistent phase of memory maintenance ( $\lambda(a) = \lambda_0/(1 + (a/A)^3)$ ); for T<sub>EM</sub> in dirty mice, estimates of  $\lambda_0$  were close to zero, and  $A$  was poorly constrained.

224 advantage over newer ones. Therefore, the limited replacement of host CD4<sup>+</sup> T<sub>CM</sub> by donor cells  
 225 derives from the decline in naive T cell numbers with age, slow average rates of turnover, and the  
 226 increased persistence of more established memory cells. This slow rate of accumulation of new T<sub>CM</sub>  
 227 in turn acts to limit the chimerism observed in T<sub>EM</sub>, which are also lost slowly.

228 One can also quantify the fates of populations after entering memory, although here our insights  
 229 are more model-dependent. The two-phase model predicts that the establishment of memory is  
 230 relatively inefficient, with ‘fast’ populations lost over timescales of days and only a small proportion  
 231 of these surviving to become more persistent ‘slow’ memory (~2-10% of T<sub>EM</sub>, and ~3-5% of T<sub>CM</sub>;  
 232 Table 2). Despite this inefficiency, the substantial constitutive influxes maintain the fast and slow  
 233 populations at comparable sizes, consistent with our previous analysis of BrdU labelling of CD4<sup>+</sup>  
 234 T<sub>CM</sub> and T<sub>EM</sub> in WT mice (*Gossel et al., 2017*). In contrast, the age-dependent loss model makes  
 235 lower estimates of the force of recruitment into memory (Figure 4, left panels) but predicts more  
 236 efficient establishment, with newly generated memory having clonal half-lives of 20-40 days and a  
 237 much greater proportion persisting longer-term (Figure 4–figure supplement 1).

### 238 Larger memory populations in dirty mice derive from early antigen exposure

239 Given the similarity of the rates of generation of memory in clean and dirty adult mice, and of  
 240 their rates of turnover, we infer that the larger, relatively stable T<sub>CM</sub> and T<sub>EM</sub> populations in dirty  
 241 mice (Figure 3A) must derive from their establishment in greater numbers in the first few weeks of  
 242 life. The differences in compartment sizes in the two environments are then sustained well into  
 243 adulthood by the very slow loss of these early memory populations.

244 To explore this hypothesis, we used the parameters estimated in adult mice to predict the  
 245 development of their CD4<sup>+</sup> MP T cell populations early in life. To do this we drew on measurements  
 246 of naive and central memory CD4<sup>+</sup> T cell numbers recovered from the spleen and lymph nodes of  
 247 WT mice aged between 5 days and 14 weeks, kept in the clean facility (Figure 5A). We then used  
 248 the naive T cell timecourse with the parameters estimated for the best-fitting (age-dependent loss)  
 249 model of T<sub>CM</sub> development in clean adult mice, to predict their accumulation of T<sub>CM</sub> from age 5d  
 250 onwards (Figure 5B, left panel), starting from the mean numbers of CD4<sup>+</sup> T<sub>CM</sub> observed at age 5d.  
 251 The model slightly underestimated T<sub>CM</sub> numbers in clean adult mice and failed to capture their rapid  
 252 accumulation up to age 4 weeks. In contrast, using the observed timecourse of T<sub>CM</sub> in clean WT  
 253 mice as a source (Figure 5A, right panel), the establishment of the T<sub>EM</sub> compartment was predicted  
 254 remarkably well by the adult parameters from the favoured two-phase model (Figure 5B, right

255 panel).

256 To predict the early kinetics of CD4<sup>+</sup> MP T cell populations in dirty mice, we first assumed  
257 their accumulation of naive T cells closely approximated that in clean mice, given that naive T  
258 cell numbers were similar in young adults from the two facilities (Figure 1B). We then used this  
259 timecourse (Figure 5A, left panel) with the parameters from the best-fitting (age-dependent loss)  
260 model of T<sub>CM</sub> development in adult dirty mice, to predict their kinetics of accumulation. This  
261 prediction underestimated T<sub>CM</sub> numbers at age 14 weeks by a factor of approximately 4 (Figure 5C,  
262 left panel). In turn, using this trajectory as the source of T<sub>EM</sub>, and using the force of recruitment  
263 and loss rates derived from adults, led to a similarly substantial underestimate of their numbers  
264 (Figure 5C, right panel). Predictions using the alternative models in all cases were even poorer; and  
265 all predictions were insensitive to the presumed numbers of T<sub>CM</sub> or T<sub>EM</sub> at age 5d, which are small  
266 and rapidly outnumbered by the influx of new memory cells from their precursor population.

267 We conclude that to account for memory T cell numbers in adulthood, mice in the clean facility  
268 experience a slightly elevated force of recruitment into T<sub>CM</sub> early in life; and this force is much larger  
269 in dirtier mice, presumably deriving from greater levels of exposure to environmental antigens.

### 270 **Analysis of germ free mice confirms roles for both autoreactive and commensal** 271 **stimuli in the establishment of memory compartments**

272 We found that the rate of constitutive recruitment into memory in adult mice was insensitive to  
273 variations in environmental commensals, and that these antigens must exert their biggest influence  
274 on the establishment of MP cells in neonates and young mice. However, earlier studies reported  
275 that numbers of memory cells in the spleens of SPF and germ-free (GF) mice are similar and argue  
276 that self-recognition is therefore the sole driver of MP cell generation in early life (*Kawabe et al.,*  
277 *2017*). To reconcile these apparent differences, and dissect the contributions of self and foreign  
278 antigens to the establishment of MP T cells in young mice, we compared the size and behaviour  
279 of memory CD4<sup>+</sup> T cell subsets in C57Bl6/J and/or C57Bl6/SJL mice housed in a wider range of  
280 environments. In addition to the clean (UCL) and dirty (NIMR) mice analysed above, we enumerated  
281 cells from GF and SPF mice obtained from the Kennedy Institute (KI) in Oxford. Consistent with  
282 these earlier studies, substantial numbers of both T<sub>CM</sub> and T<sub>EM</sub> MP cells were recovered from  
283 GF mice aged between 40-200d, confirming that the generation of MP cells does not depend  
284 exclusively on commensal-derived foreign antigens (Figure 6A). However, the memory CD4<sup>+</sup> T cell  
285 compartments of GF mice, enumerated from spleen and lymph nodes combined, were significantly  
286 smaller than in the SPF mice in all facilities. Clean mice from KI and UCL had similar-sized memory  
287 compartments, and in turn both were substantially smaller than those in mice from the dirty facility  
288 (NIMR) (Figure 6A). Indeed the dirty mice played host to around five times the number of MP cells  
289 found in GF mice, indicating that antigens from commensal organisms are a substantial driver of  
290 MP cell expansion.

291 We also analysed the proliferative activity of MP cells in mice from the different environments,  
292 by measuring the expression of Ki67. Division of MP cells is dependent on TCR (*Seddon et al., 2003*)  
293 and CD28 costimulation signaling (*Kawabe et al., 2017*). A substantial fraction of MP cells in GF mice  
294 expressed Ki67 (Figure 6B), indicating cell cycle activity within the previous 3-4 days (*Gossel et al.,*  
295 *2017*). This proportion was broadly similar to that in mice from both clean and dirty environments,  
296 indicating that the level of proliferation of CD4<sup>+</sup> MP T cells in adult mice was relatively insensitive to  
297 environmentally-derived stimuli.

### 298 **Quantifying the forces exerted by commensals on memory generation early in life**

299 Finally, we estimated the rates of memory generation in young mice in the different environments.  
300 We began with the favoured age-dependent loss model of T<sub>CM</sub> dynamics. Using the parameters  
301 from clean adult mice (which were similar to those estimated for dirty mice, and for which no  
302 estimates were available for GF mice), and the empirical description of CD4<sup>+</sup> naive T cell numbers in  
303 clean WT mice (Figure 5A), we then estimated the fold changes in the force of recruitment  $\phi$  needed

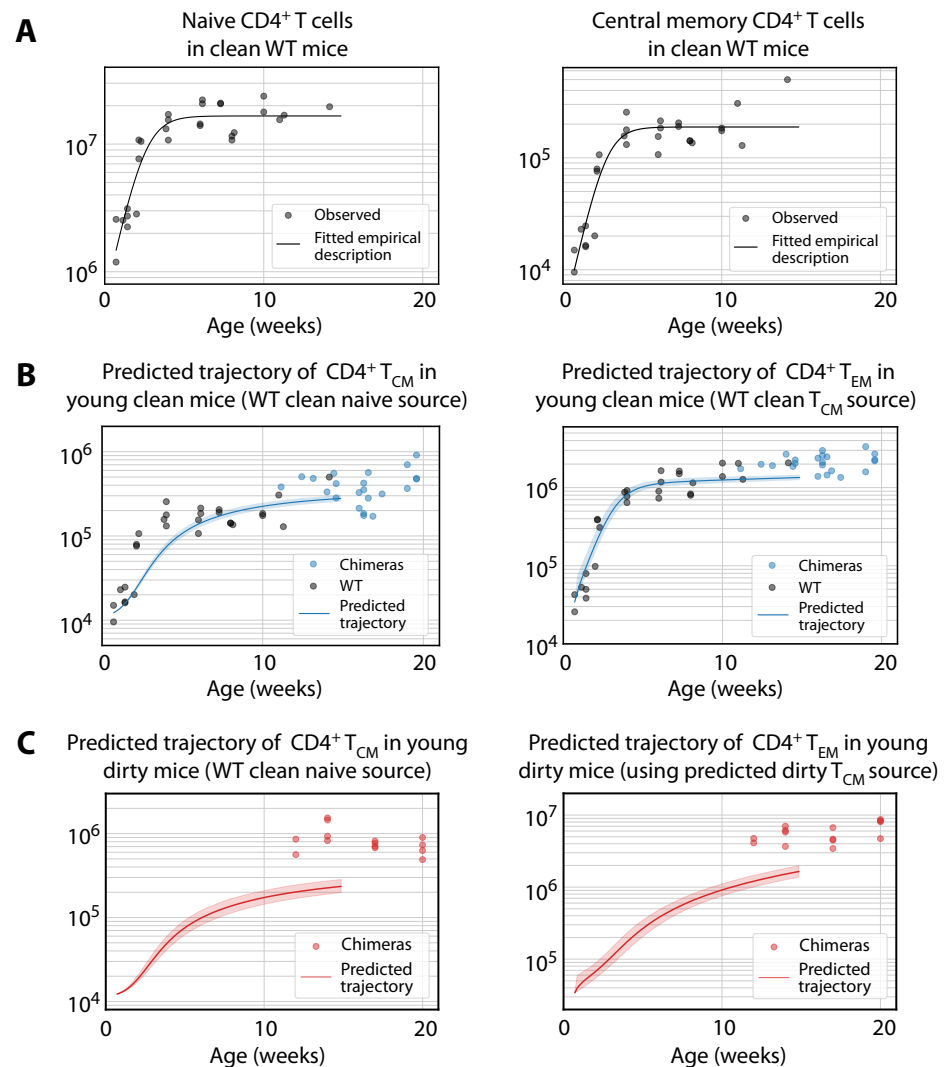

**Figure 5. Predicting the establishment of CD4<sup>+</sup> T<sub>CM</sub> and T<sub>EM</sub> in clean and dirty mice.** (A) The timecourses of numbers of CD4<sup>+</sup> naive T cells and T<sub>CM</sub> recovered from the spleen and lymph nodes of wild-type (WT) mice housed in the clean facility at UCL, aged 5 days to 15 weeks. We fitted a descriptor function  $S(t) = S_{\max}/(1 + e^{-rt}(S_{\max} - S_{\min})/S_{\min})$  to both, using least squares on the log-transformed observations. (B) Using these curves to predict the development of CD4<sup>+</sup> T<sub>CM</sub> and T<sub>EM</sub> in clean mice using the best-fitting model parameters from adults. Shaded regions indicate the spread of predictions over the 95% confidence intervals of the parameters. The black points (not used for fitting) are the numbers of CD4<sup>+</sup> T<sub>CM</sub> and T<sub>EM</sub> recovered from clean WT mice. (C) Using CD4<sup>+</sup> naive T cells from young clean mice as a source, we used the age-dependent loss model of T<sub>CM</sub> dynamics in adult dirty mice to predict their accumulation (left panel). This trajectory in turn was used to predict the accumulation of T<sub>EM</sub> in the same mice (right panel).

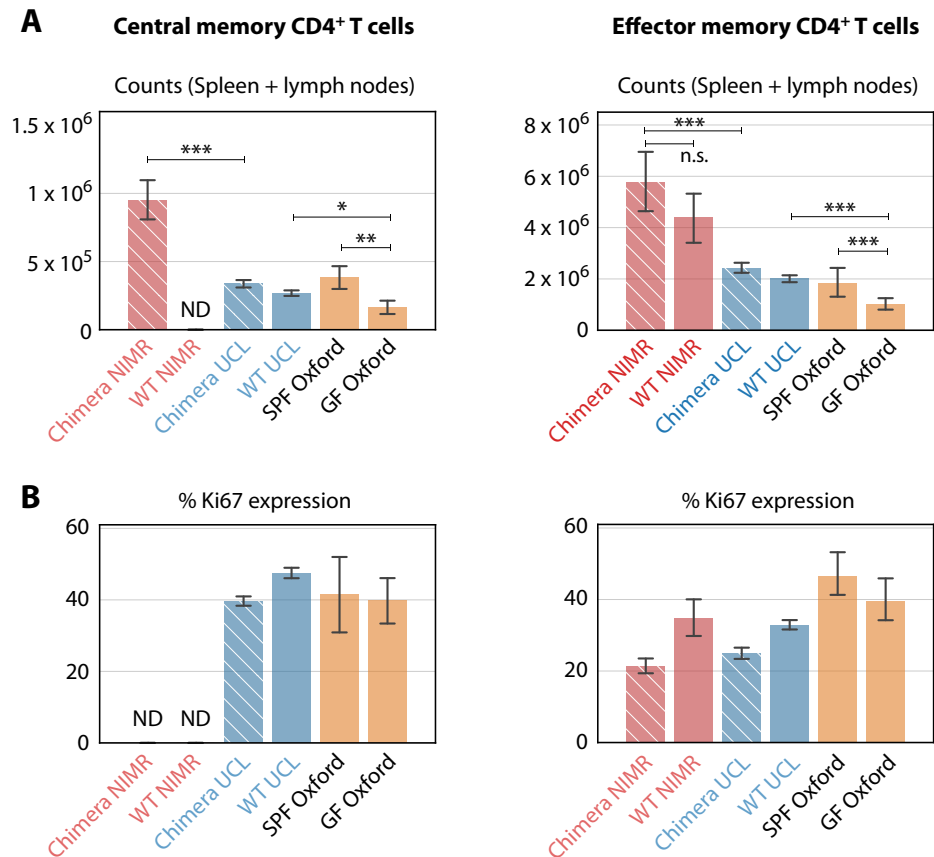

**Figure 6. Comparing numbers (A) and proliferative activity (B) of CD4<sup>+</sup> T<sub>CM</sub> and T<sub>EM</sub> in adult mice in different SPF and GF facilities.** Cross-hatched bars denote busulfan chimeras, solid bars WT mice. NIMR (red bars) and UCL (blue bars) are the 'dirty' and 'clean' facilities used for the bulk of the analysis presented here. 'ND' denotes data not available. \* p < 0.05, \*\* p < 0.01, \*\*\* p < 0.001, using the Mann-Whitney test. Group sizes: Panels A; (28, 0, 78, 98, 4, 14) and (46, 11, 78, 98, 4, 14). Panels B; (0, 0, 74, 140, 4, 14) and (18, 4, 74, 140, 4, 14).

304 during the first 11 weeks of life needed to seed  $CD4^+ T_{CM}$  at the average numbers observed in the  
305 mice aged between 10 and 28 weeks (Figure 7, left panel).  $CD4^+ T_{CM}$  numbers were relatively stable  
306 in all facilities during this period. GF mice needed approximately 0.4 times the force of recruitment  
307 in clean adult mice, younger clean mice needed a force approximately 1.1 times greater, and dirty  
308 mice required a 2.7-fold increase. As before, uncertainty in memory cell numbers at age 5d had  
309 very little effect on the predicted levels of memory attained at week 11, or on these estimated  
310 correction factors.

311 We then used these environment-specific, corrected trajectories of  $T_{CM}$  development to predict  
312 the accumulation of  $T_{EM}$  by age 11 weeks, using the favoured two-phase model. Remarkably, after  
313 accounting for the different  $T_{CM}$  population sizes, the force of recruitment from  $T_{CM}$  to  $T_{EM}$  estimated  
314 in clean adult mice was also sufficient to account for  $T_{EM}$  numbers in all three environments (Figure 7,  
315 right panel).

316 In summary, this analysis showed that approximately 2- to 3-fold increases or decreases in the  
317 force of recruitment into  $CD4^+ T_{CM}$  observed in clean adult (UCL) mice were sufficient to explain  
318 their numbers in dirty mice from NIMR or GF mice. However the subsequent rate of development  
319 of  $T_{EM}$  from  $T_{CM}$  appeared to be independent of both mouse age and environment, and differences  
320 in the numbers of  $T_{EM}$  could be explained simply by the differences in the size of the  $T_{CM}$  precursor  
321 population. These results suggest that the rate of generation of  $CD4^+ T_{CM}$  from naive T cells in  
322 young mice reflects both self antigens and the level of exposure to environmental antigens, but  
323 that the rate of differentiation from  $T_{CM}$  to  $T_{EM}$  is largely insensitive to these forces.

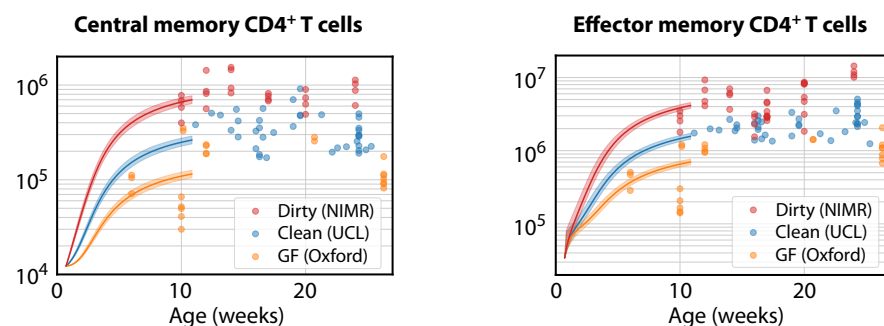

**Figure 7. Modelling the ontogeny of  $CD4^+$  memory T cell subsets in different facilities.** Using the timecourse of  $CD4^+$  naive T cell numbers in young clean WT control mice (Figure 5A), and the parameters estimated in clean adult mice, we estimated the corrections to the force of recruitment  $\phi$  needed from birth to age 11 weeks to generate the mean numbers of  $T_{CM}$  in adults aged 10-28 weeks in each environment (left panel). These corrected  $T_{CM}$  trajectories, together with the force of recruitment and loss rates estimated from clean adult mice, predicted the accumulation of  $CD4^+ T_{EM}$  up to age 11 weeks in all three rates environments (right panel).

## 324 Discussion

325 In this study, we compared mice housed in facilities with distinct antigenic burdens to investi-  
326 gate the nature, magnitude and timing of the forces that establish and maintain  $CD4^+$  MP T cell  
327 compartments. We examined (i) tonic recruitment into the  $T_{CM}$  and  $T_{EM}$  pools in adults, (ii) the  
328 kinetic substructure and maintenance of these compartments throughout life, and (iii) their genera-  
329 tion/establishment early in life. Our analyses indicate that self recognition contributes to all these  
330 processes, but that the contribution of reactivity to commensal antigens is largely restricted to the  
331 neonatal period.

332 Our analysis of GF mice, which lack exposure to commensal organisms, confirmed earlier  
333 work showing that generation of MP cells in adults is not driven exclusively by foreign commen-  
334 sals (*Kawabe et al., 2017*) and suggesting that self-recognition is instead the key driver. GF mice  
335 are not entirely free of environmental antigens and it is possible that proteins in bedding material

336 and diet could represent foreign antigenic stimuli. However, the argument for self-recognition is  
337 made through the correlation of the degree of MP cell conversion and steady state proliferation  
338 with affinity for self-MHC, as indicated by CD5 expression. We also found that memory CD4<sup>+</sup> T cell  
339 division, as reported by Ki67, was substantial and largely independent of the level of commensals.  
340 We could not determine the extents to which Ki67 expression derived from the homeostatic prolifer-  
341 ation of existing cells or the influx of newly generated MP cells. However, the common levels of  
342 Ki67 across environments, together with our findings from the adult clean and dirty chimeric mice  
343 that the rates of memory generation and net loss were insensitive to environment, support our  
344 conclusion that self-recognition is the major driver of both recruitment and proliferative renewal in  
345 adult memory compartments.

346 Commensals did, however, have a substantial impact upon the sizes of the memory compart-  
347 ments generated early in life. CD4<sup>+</sup> T<sub>CM</sub> and T<sub>EM</sub> numbers in mice raised in dirty environments were  
348 3-5 times greater than those in either GF or cleaner IVC or SPF facilities, and these differences could  
349 be explained by differences in the forces of recruitment of CD4<sup>+</sup> T<sub>CM</sub> during ontogeny. The esti-  
350 mated 7-fold difference in this force between GF and dirty mice prompts the simple interpretation  
351 that self-recognition only accounts for ~14% of the memory compartment in dirty mice.

352 We ascribe differences in memory compartment sizes to different commensal burdens, but it is  
353 possible that their smaller sizes in GF mice also derive from their smaller lymph nodes. Bacterial  
354 stimulation of DCs is required for their migration into lymph nodes, and these DCs are required  
355 for their normal development (*Wendland et al., 2011; Moussion and Girard, 2011; Zhang et al.,*  
356 *2016*). Therefore, it is not straightforward to separate the indirect influence of commensals on  
357 lymphoid development from any direct influences upon memory generation. It is also possible  
358 that some of the additional force of recruitment in neonates derives not from commensals but  
359 from lymphopenia, which can drive naive T cells to acquire a memory phenotype (*Min et al., 2003*).  
360 However, this process was demonstrated by transferring naive cells from adults into very young  
361 mice; it is possible that such naive cells do not represent the activity of neonatal naive T cells, which  
362 are almost exclusively RTE.

363 We observed that environment not only impacted memory but also naive T cells. Their numbers  
364 naturally decline with age, but this decline was almost twice as fast in dirty mice than in genetically  
365 identical mice housed in cleaner facilities (Figure 1–figure supplement 2A; numbers halve every  
366 228d (95% CI 227-231) in clean mice, and 143d (142-144) in dirty mice). This difference likely derives  
367 from more rapid reduction in thymic output with age in the dirty environment, and not differences  
368 in lifespans of CD4<sup>+</sup> naive T cells in the two environments, because we see similar rates of decline  
369 in the numbers of single positive SP thymocytes at the latest stage of thymic development (halving  
370 every every 282d (281-308) in clean mice, 151d (150-159) in dirty mice; data not shown). Therefore,  
371 it appears that another consequence of life in a more antigenically diverse environment is more  
372 rapid involution of the thymus. It is possible that this effect derives from the stress or inflammation  
373 associated with an increased commensal burden, or is somehow a consequence of expanded  
374 memory populations; but whatever the mechanism, our data clearly indicate that environmental  
375 factors can impact the maintenance of naive T cells.

376 Our models do not incorporate any homeostatic regulation in the sense of modulation of rates  
377 of division or loss through quorum sensing. Since memory cell numbers only vary by a factor of  
378 2-3 between clean and dirty mice these mice, we did not expect to detect any strong variation in  
379 net loss rate with pool size with these data, and indeed our estimates of loss rates were similar in  
380 the two environments. While we cannot rule it out at higher cell densities, there is arguably little  
381 evidence for homeostatic regulation of circulating memory T cells in SPF mice. We observed a range  
382 of relatively stable memory compartment sizes in the different containment facilities; these memory  
383 compartments do not appear to ‘fill up’ rapidly with large clones in very young mice, which might  
384 occur if division or loss rates are sensitive to total pool size; and they appear to be expandable  
385 following multiple infections in older animals (*Vezyz et al., 2009*).

386 The models yielded robust conclusions regarding the nature and magnitudes of the forces



387 generating CD4<sup>+</sup> T<sub>CM</sub> and T<sub>EM</sub>, and the existence of heterogeneity within both subsets, consistent  
388 with previous reports by ourselves and others of subpopulations of CD4<sup>+</sup> MP cells with distinct  
389 rates of division and turnover (*Younes et al., 2011; Gossel et al., 2017*). However, these models  
390 are abstractions, and resolving the details of kinetic substructure in lymphocyte populations is  
391 challenging (*Ganusov et al., 2010*). For CD4<sup>+</sup> T<sub>CM</sub> in adult mice we found evidence for slow and  
392 continuous changes in their net loss rates as cells age, and additional support for such a process  
393 comes from the slow rate at which Ki67 levels in donor and host memory cells converge in adult  
394 busulfan chimeras. In contrast, the data for T<sub>EM</sub> in adult mice, and the predictions of their accu-  
395 mulation in younger mice, more strongly supported a discrete two-phase model with a relatively  
396 rapid transition from fast to slow memory. Our previous study of CD4<sup>+</sup> T<sub>CM</sub> and T<sub>EM</sub> homeostasis  
397 in adult mice used short-term BrdU labelling to identify populations in both subsets that divide  
398 and die rapidly (*Gossel et al., 2017*), although in that study we assumed the proliferative and more  
399 quiescent pools were maintained independently and so it is not straightforward to compare the  
400 rate estimates with those presented here. Overall, though, it seems likely that both MP cell subsets  
401 are more heterogeneous than any one of our models suggests. Indeed, there are other potential  
402 sources of heterogeneity. One possibility is that MP T cells are generated with a distribution of net  
403 loss rates, and those clones with greater intrinsic fitness (lower net loss rates) are simply selected  
404 for over time. Such a mechanism – a generalisation of the simple ‘resistant memory’ model we  
405 rejected here – could explain the under-representation of donor cells in the memory compartments  
406 of busulfan chimeric mice, and may be difficult to distinguish from our model of gradual changes in  
407 fitness with cell age; indeed the two mechanisms are not mutually exclusive. Characterising the  
408 homeostatic dynamics of CD4<sup>+</sup> memory T cells, and ultimately how these dynamics relate to their  
409 functional capacity, requires further study.

## 410 **Methods and Materials**

### 411 **Generating busulfan chimeric mice**

412 Mice were treated with optimised low doses of busulfan to deplete HSC but leave peripheral T cell  
413 subsets intact. HSC were reconstituted with congenically-labelled, T-cell depleted bone marrow to  
414 generate stable chimeras (Figure 1A). Details of the protocols are given in (*Hogan et al., 2017b*) and  
415 (*Hogan et al., 2017a*).

### 416 **Mice**

417 Busulfan chimeric mice and wild-type control mice were housed in conventional animal facilities,  
418 either at the National Institute for Medical Research, London, UK (NIMR); or at the UCL Royal Free  
419 Campus, London, UK (UCL). At NIMR, mice were housed in open cages and drank tap water. At UCL,  
420 mice were housed in individually ventilated cages and drank irradiated water. Germ Free and SPF  
421 mice were housed at the Oxford Centre for Microbiome Studies, Oxford, UK.

### 422 **Flow cytometry**

423 Single cell suspensions were prepared from the thymus, spleen and lymph nodes of busulfan  
424 chimeric mice, wildtype control mice, or germ free mice. Cells were stained with the following  
425 monoclonal antibodies and cell dyes: CD45.1 FITC, CD45.2 FITC, CD45.2 AlexaFluor700, TCR- $\beta$   
426 APC, CD4<sup>+</sup> PerCP-eFluor710, CD44 APC-eFluor780, CD25 PE, CD25 eFluor450, CD25 PE-Cy7, CD62L  
427 eFluor450, NK1.1 PE-Cy7 (all eBioscience), CD45.1 BV650, CD45.2 PE-Dazzle, TCR- $\beta$  PerCP-Cy5.5  
428 CD4<sup>+</sup> BV711, CD44 BV785, CD25 BV650 (all Biolegend), CD62L BUV737 (BD Biosciences), LIVE/DEAD  
429 nearIR and LIVE/DEAD blue viability dyes. For Ki67 staining, cells were fixed using the eBioscience  
430 Foxp3/ Transcription Factor Staining Buffer Set and stained with either anti-mouse Ki67 FITC or PE  
431 (both eBioscience). Cells were acquired on a BD LSR-II or a BD LSR-Fortessa flow cytometer and  
432 analysed with Flowjo software (Treestar). Conventional CD4<sup>+</sup> cells were identified as live TCR- $\beta$ +  
433 CD4<sup>+</sup> CD25<sup>-</sup> NK1.1<sup>-</sup>, and then CD44 and CD62L were used to identify EM (CD44+CD62L<sup>-</sup>) and CM  
434 (CD44+CD62L<sup>+</sup>) subsets.

## 435 **Modelling the fluxes between naive, central memory and effector memory CD4<sup>+</sup>** 436 **subsets**

437 The homogeneous model

438 Our simplest description of the kinetics of the generation and renewal of CD4<sup>+</sup> T<sub>CM</sub> and T<sub>EM</sub> is  
439 illustrated in Figure 2A and was formulated as follows. We assume that cells flow into a memory  
440 subset of total size  $M(t)$  from a precursor population  $S(t)$  at total rate  $\varphi S(t)$ , where  $t$  is the age of  
441 the animal. The rate constant  $\varphi$  is the ‘force of recruitment’, a compound parameter which is the  
442 product of the *per capita* rate of recruitment of cells from the source population per day multiplied  
443 by number representing any net expansion that occurs during recruitment. Memory is also lost  
444 at net *per capita* rate  $\lambda$ . This rate is the balance of loss through death and/or differentiation, and  
445 any compensatory cell production through division. It represents the rate of decline or growth of a  
446 population that self-renews to any extent, rather than the loss rate of individual cells. We place no  
447 constraints on this rate, and so  $\lambda$  may be positive or negative.

$$\frac{dM(t)}{dt} = \varphi S(t) - \lambda M(t). \quad (1)$$

448 We assume host and donor cells each obey the same kinetics, so that

$$\frac{dM_{\text{host}}(t)}{dt} = \varphi S_{\text{host}}(t) - \lambda M_{\text{host}}(t) \quad (2)$$

$$\frac{dM_{\text{donor}}(t)}{dt} = \varphi S_{\text{donor}}(t) - \lambda M_{\text{donor}}(t), \quad (3)$$

449 where the total population size is  $M(t) = M_{\text{donor}}(t) + M_{\text{host}}(t)$ . Our strategy for parameter estimation  
450 was to fit this model simultaneously to the timecourses of total numbers of memory cells  $M(t)$ ,  
451 and the donor chimerism within memory,  $\chi_M(t)$ , which is the fraction of cells in memory that are  
452 donor-derived. For reasons detailed below, we normalise this fraction to the proportion of early  
453 double-positive (DP1) thymocytes that are donor-derived, which is measured in the same mouse  
454 and denoted  $\chi_{\text{DP1}}$ :

$$\chi_{\text{DP1}} = \frac{\text{DP1}_{\text{donor}}}{\text{DP1}_{\text{host+donor}}}, \quad \chi_M(t) = \frac{M_{\text{donor}}(t)}{M(t)}, \quad \chi_{M, \text{norm}}(t) = \frac{\chi_M(t)}{\chi_{\text{DP1}}}. \quad (4)$$

455 Eqns. 2 and 3 then give

$$\frac{d}{dt} \chi_{M, \text{norm}}(t) = \frac{d}{dt} \left( \frac{M_{\text{donor}}(t)}{\chi_{\text{DP1}}(t) M(t)} \right) = \frac{1}{\chi_{\text{DP1}}(t)} \frac{d}{dt} \left( \frac{M_{\text{donor}}(t)}{M(t)} \right) - \frac{d\chi_{\text{DP1}}/dt}{\chi_{\text{DP1}}(t)^2} \left( \frac{M_{\text{donor}}(t)}{M(t)} \right). \quad (5)$$

If observations are made sufficiently long after BMT (more than 3-4 weeks), chimerism among DP thymocytes can be assumed to have stabilised (*Hogan et al., 2015*) and so we can neglect the term in  $d\chi_{\text{DP1}}/dt$ . Then

$$\begin{aligned} \frac{d}{dt} \chi_{M, \text{norm}}(t) &= \frac{1}{\chi_{\text{DP1}} M(t)} \left( \varphi S_{\text{donor}}(t) - \lambda M_{\text{donor}}(t) - \frac{M_{\text{donor}}(t)}{M(t)} \frac{dM(t)}{dt} \right) \\ &= \frac{1}{\chi_{\text{DP1}} M(t)} \left( \varphi S_{\text{donor}}(t) - \lambda M_{\text{donor}}(t) - \chi_M(t) (\varphi S(t) - \lambda M(t)) \right) \\ &= \frac{1}{\chi_{\text{DP1}} M(t)} \left( \varphi S_{\text{donor}}(t) - \chi_M(t) \varphi S(t) \right) \\ &= \frac{\varphi S(t)}{M(t)} \left( \chi_{\text{source, norm}}(t) - \chi_{M, \text{norm}}(t) \right), \end{aligned} \quad (6)$$

456 where we define

$$\chi_{\text{source, norm}}(t) = \frac{1}{\chi_{\text{DP1}}} \frac{S_{\text{donor}}(t)}{S(t)}. \quad (7)$$

457 By normalising the chimerism of both the source and the memory populations to that in the thymus,  
458 we remove any variation in these quantities due to variation across individuals in the degree of  
459 chimerism achieved with busulfan treatment and BMT.

460 Fitting required initial conditions for the total numbers of memory cells and donor chimerism.  
 461 We solved all of the models from host age  $t_0$ , which was chosen to be the time at which donor  
 462 chimerism in memory for the mouse with the youngest age at BMT could be assumed to be zero  
 463 and donor chimerism in DP1 had stabilised. This was host age 66d for the clean mice and 84 days  
 464 for dirty mice (26d and 28d post-BMT respectively). Our results were insensitive to changes of a few  
 465 days in these baseline ages. We also required functional forms for the kinetics of the immediate  
 466 precursor (source) population  $S(t)$  and  $\chi_{\text{source, norm}}(t)$ . When considering CD4<sup>+</sup> naive T cells as a  
 467 source, their numbers from age  $t_0$  onwards in both facilities were well described with an exponential  
 468 decay curve,  $S(t) = S(t_0)e^{-vt}$ , though with different exponents (Figure 1-figure supplement 2A). With  
 469 this form we can solve eqn. 1 for  $M(t)$  explicitly;

$$M(t) = M(t_0)e^{\lambda(t_0-t)} + \int_{s=t_0}^t \varphi S(s)e^{-\lambda(t-s)} ds \quad (8)$$

$$\begin{aligned} &= M(t_0)e^{\lambda(t_0-t)} + \varphi S(t_0)e^{-\lambda t} \int_{s=t_0}^t e^{-(v-\lambda)s} ds \\ &= M(t_0)e^{\lambda(t_0-t)} + \frac{\varphi S(t_0)}{\lambda - v} (e^{-vt} - e^{\lambda(t_0-t)-vt_0}). \end{aligned} \quad (9)$$

470 Using this expression for  $M(t)$  in eqn. (6), the kinetics of normalised chimerism in memory are

$$\begin{aligned} \frac{d}{dt} \chi_{M, \text{norm}}(t) &= \frac{\varphi S(t_0)e^{-vt}}{M(t_0)e^{\lambda(t_0-t)} + \frac{\varphi S(t_0)}{\lambda - v} (e^{-vt} - e^{\lambda(t_0-t)-vt_0})} \times (\chi_{\text{source, norm}}(t) - \chi_{M, \text{norm}}(t)) \\ &= \frac{1}{e^{(v-\lambda)t} \left( \frac{e^{-(v-\lambda)t_0}}{v-\lambda} + \frac{M(t_0)e^{\lambda t_0}}{\varphi S(t_0)} \right) - \frac{1}{v-\lambda}} \times (\chi_{\text{source, norm}}(t) - \chi_{M, \text{norm}}(t)). \end{aligned} \quad (10)$$

471 The rate of increase in donor chimerism in memory then depends on the force of recruitment  $\varphi$ ,  
 472 the dynamics and chimerism of the source ( $S(t_0)e^{-vt}$  and  $\chi_{\text{source, norm}}(t)$ ), the initial memory pool size  
 473  $M(t_0)$ , and the net loss rate  $\lambda$ . Note that eqn. (10) predicts that given sufficiently long, and if the rate  
 474 of decline of naive T cells is less than the rate of loss of memory ( $v < \lambda$ ), the chimerism in memory  
 475 will stabilise at the chimerism of CD4<sup>+</sup> naive T cells.

476 When considering  $T_{\text{CM}}$  as a source for  $T_{\text{EM}}$  in clean and dirty mice, we described  $S(t)$  with sigmoid  
 477 and exponential decay functions respectively (Figure 1-figure supplement 2B). We described each  
 478 source's chimerism with the generalised logistic function (Figure 1-figure supplement 2C and D).

479 The homogeneous model is characterised by the three unknowns  $M(t_0)$ ,  $\lambda$  and  $\varphi$ . To estimate  
 480 them for a given subset, location and source population we solved eqns. 1 and 6 numerically and  
 481 fitted them simultaneously to the timecourses of total numbers and normalised chimerism of the  
 482 memory subset, using a method detailed below. The clean mice underwent BMT at a range of  
 483 ages, which were accounted for individually in the fitting; model predictions for a mouse which  
 484 underwent BMT at age  $t_B$  and was observed at age  $t$  were generated by running the model from  
 485 host age  $T = t_B + 26d$  (clean) or  $t_B + 28d$  (dirty) to time  $t$ ; with  $M(T)$  calculated from  $M(t_0)$  using  
 486 eqn. 8, and the normalised chimerism at time  $T$  assumed to be zero.

487 The two-phase model

488 The two-phase model (Figure 2B) describes the kinetics of CD4<sup>+</sup>  $T_{\text{CM}}$  and  $T_{\text{EM}}$  assuming that both  
 489 comprise two subpopulations with distinct rates of loss,

$$M(t) = M_{\text{fast}}(t) + M_{\text{slow}}(t), \quad (11)$$

490 where  $t$  is the mouse age. We assume that cells flow only into one subset from the precursor  
 491 population  $S(t)$  at total rate  $\varphi S(t)$ , and transition to the next compartment at rate  $\gamma$ ;

$$\begin{aligned} \frac{dM_{\text{fast}}(t)}{dt} &= \varphi S(t) - \gamma M_{\text{fast}}(t) - \lambda_{\text{fast}} M_{\text{fast}}(t) \\ \frac{dM_{\text{slow}}(t)}{dt} &= \gamma M_{\text{fast}}(t) - \lambda_{\text{slow}} M_{\text{slow}}(t). \end{aligned} \quad (12)$$

492 Note that despite the nomenclature, when estimating the rates of loss of these subsets, we did not  
 493 constrain them; rather, the model fits indicated that  $\lambda_{\text{fast}} > \lambda_{\text{slow}}$ .

494 Assuming that host and donor cells obey the same kinetics, so that eqns. 12 hold identically for  
 495 both populations, then similar to the derivation of eqn. 6 we obtain the following equations for the  
 496 dynamics of donor chimerism in the fast and slow subsets, each normalised to the chimerism of  
 497 DP1 thymocytes;

$$\begin{aligned} \frac{d}{dt} \chi_{\text{fast, norm}}(t) &= \frac{\varphi S(t)}{M_{\text{fast}}(t)} (\chi_{\text{source, norm}}(t) - \chi_{\text{fast, norm}}(t)) \\ \frac{d}{dt} \chi_{\text{slow, norm}}(t) &= \frac{\gamma M_{\text{fast}}(t)}{M_{\text{slow}}(t)} (\chi_{\text{fast, norm}}(t) - \chi_{\text{slow, norm}}(t)), \end{aligned} \quad (13)$$

498 where

$$\chi_{\text{fast, norm}}(t) = \frac{1}{\chi_{\text{DP1}}} \frac{M_{\text{fast}}^{\text{donor}}(t)}{M_{\text{fast}}(t)}, \quad \chi_{\text{slow, norm}}(t) = \frac{1}{\chi_{\text{DP1}}} \frac{M_{\text{slow}}^{\text{donor}}(t)}{M_{\text{slow}}(t)}. \quad (14)$$

499 The normalised chimerism in the fast and slow populations combined is

$$\chi_{\text{M, norm}}(t) = \chi_{\text{fast, norm}}(t) \frac{M_{\text{fast}}(t)}{M(t)} + \chi_{\text{slow, norm}}(t) \frac{M_{\text{slow}}(t)}{M(t)}. \quad (15)$$

500 We dealt with different ages at BMT using the same approach described for the simplest model.  
 501 We determined the initial sizes of the subsets  $M_{\text{fast}}(t_0)$  and  $M_{\text{slow}}(t_0)$  by assuming that fast cells  
 502 were in quasi-equilibrium with their source, because all T cell populations change slowly in adult  
 503 mice (Figure 1B); and allowing  $M_{\text{slow}}(t_0)$  to be free. Allowing both population sizes to be free yielded  
 504 very similar results, at the cost of an additional parameter. The numbers of host-derived cells in the  
 505 fast and slow memory subsets at each time  $T$  were then generated from  $M_{\text{fast}}(t_0)$  and  $M_{\text{slow}}(t_0)$  by  
 506 running the model forward from age  $t_0$  using eqns. 12. The two-phase model is then characterised  
 507 by five unknowns;  $M_{\text{slow}}(t_0)$ ,  $\lambda_{\text{fast}}$  and  $\lambda_{\text{slow}}$ , the transition rate  $\gamma$ , and the force of recruitment  $\varphi$ . To  
 508 estimate these parameters we fitted the solutions of eqns. 11, 12, and 15 simultaneously to the  
 509 timecourses of total memory cell numbers  $M(t)$  and the normalised chimerism  $\chi_{\text{M, norm}}(t)$ , using the  
 510 empirical forms of  $S(t)$  and  $\chi_{\text{source, norm}}(\tau)$  where  $t$  is host age and  $\tau$  is time post-BMT. To visualise  
 511 the fits to data from the clean facility we partitioned the mice into four groups based on age at BMT,  
 512 and plotted the model predictions for the median age at BMT within each group (Figure 3B).

### 513 The age-dependent loss model

514 In this model (Figure 2C) the loss rate  $\lambda$  is a function of the time since entry of a cell or its ancestor  
 515 into memory, which we denote its age  $a$ . The time evolution of the population density of memory  
 516 cells of age  $a$  at host age  $t$  is given by

$$\frac{\partial M(t, a)}{\partial t} + \frac{\partial M(t, a)}{\partial a} = -\lambda(a)M(t, a), \quad (16)$$

517 where the population density of cells of age zero is the rate at which cells flow into memory from  
 518 the source,

$$M(t, a = 0) = \varphi S(t), \quad (17)$$

519 and we must specify the overall population density with respect to cell age  $M(t_0, a) = g(a)$  at some  
 520 initial mouse age,  $t_0$ . As with the other models, we assumed all cells present at  $t_0$  are host-derived;  
 521 we model their age distribution as  $g(a) = \varphi S(t_0) e^{pa}$ . The free parameter  $p$  could be positive or  
 522 negative, such that older cells can initially be over- or under-represented compared to younger  
 523 cells. This definition ensures  $g(0)$  is the rate of influx of cells of age zero from the source at time  
 524  $t_0$ ,  $\varphi S(t_0)$ . We explored exponential ( $\lambda(a) = \lambda_0 e^{-a/A}$ ) and sigmoid ( $\lambda(a) = \lambda_0 / (1 + (a/A)^n)$ ) forms for  
 525 the dependence of the net loss rate  $\lambda$  on cell age, with  $n = 1, 2, 3, 5$  and 10. We found that  $n = 3$   
 526 consistently yielded the best fits, with the exponential performing the most poorly.

527 Solving this system using the method of characteristics allows us to track the fates of three  
 528 cell populations – the host-derived population that was present at  $t_0$  ( $M_{\text{host}}^{\text{init}}(t, a)$ ), and host- and

529 donor-derived cells that entered the population after  $t_0$  ( $M_{\text{host}}^{\text{new}}(t, a)$  and  $M_{\text{donor}}(t, a)$ ). Total memory  
530 cell numbers at  $t \geq t_0$  are then

$$M_{\text{total}}(t) = \int_{a=0}^t (M_{\text{host}}^{\text{init}}(t, a) + M_{\text{host}}^{\text{new}}(t, a) + M_{\text{donor}}(t, a)) da. \quad (18)$$

531 The terms in this expression evolve according to

$$\begin{aligned} M_{\text{host}}^{\text{init}}(t, a) &= g(a - (t - t_0)) \exp\left(-\int_{a-(t-t_0)}^a \lambda(s) ds\right), \quad t - t_0 \leq a \leq t \\ M_{\text{host}}^{\text{new}}(t, a) &= \varphi S_{\text{host}}(t - a) \exp\left(-\int_0^a \lambda(s) ds\right), \quad 0 \leq a \leq t - t_0 \\ M_{\text{donor}}(t, a) &= \varphi S_{\text{donor}}(t - a) \exp\left(-\int_0^a \lambda(s) ds\right), \quad 0 \leq a \leq t - t_0. \end{aligned} \quad (19)$$

532 where  $S_{\text{host}}(t) = (1 - \chi_{\text{source}}(t))S(t)$  and  $S_{\text{donor}}(t) = \chi_{\text{source}}(t)S(t)$ . These expressions give

$$M_{\text{total}}(t) = \int_{a=t-t_0}^t g(a - (t - t_0)) \exp\left(-\int_{a-(t-t_0)}^a \lambda(s) ds\right) da + \varphi \int_{a=0}^{t-t_0} S(t - a) \exp\left(-\int_0^a \lambda(s) ds\right) da. \quad (20)$$

533 The normalised donor chimerism is

$$\begin{aligned} \chi_{\text{M, norm}}(t) &= \frac{M_{\text{donor}}(t)}{\chi_{\text{DP1}} M_{\text{total}}(t)} = \frac{\int_{a=0}^{t-t_0} M_{\text{donor}}(t, a) da}{\chi_{\text{DP1}} M_{\text{total}}(t)} \\ &= \frac{\varphi}{M_{\text{total}}(t)} \int_{a=0}^{t-t_0} \chi_{\text{source, norm}}(t - a) S(t - a) \exp\left(-\int_0^a \lambda(s) ds\right) da. \end{aligned} \quad (21)$$

534 We fitted eqns. 20 and 21 to the timecourses of their observed counterparts from host age  $t_0$   
535 onwards. This model has four free parameters;  $p$  and  $\varphi$ , which, together with the observed value of  
536  $S(t_0)$ , specify the initial age distribution of host cells,  $g(a) = \varphi S(t_0) e^{pa}$ ; and  $\lambda_0$  and  $A$ , which specify  
537 the form of  $\lambda(a)$ . The parameters  $p$  and  $\varphi$  then determine the initial number of host-derived memory  
538 cells;

$$M_{\text{total}}(t_0) \equiv \int_0^{t_0} g(a) da = \varphi S(t_0) (e^{pt_0} - 1) / p. \quad (22)$$

539 As described above, this model can be fitted simultaneously to data from mice who underwent  
540 BMT at different ages, replacing  $t_0$  in eqn. 21 with the age at BMT plus 26d or 28d for clean and dirty  
541 mice respectively.

### 542 Resistant memory model

543 In this model, proposed in *Gossel et al. (2017)*, the  $\text{CD4}^+$   $T_{\text{CM}}$  and  $T_{\text{EM}}$  populations are assumed to  
544 be heterogeneous, each consisting of a 'displaceable' subset turning over at rate  $\lambda$  and continuously  
545 supplemented from the source, and an 'incumbent' subpopulation of host cells,  $I_{\text{host}}(t)$ ; these are  
546 assumed to be established early in life, not supplemented thereafter, and have a distinct net loss  
547 rate  $\lambda_I$ :

$$\begin{aligned} \frac{dM_{\text{donor}}(t)}{dt} &= \varphi \chi_{\text{source}}(t) S(t) - \lambda M_{\text{donor}}(t) && \text{(displaceable, donor)} \\ \frac{dM_{\text{host}}(t)}{dt} &= \varphi (1 - \chi_{\text{source}}(t)) S(t) - \lambda M_{\text{host}}(t) && \text{(displaceable, host)} \\ \frac{dI_{\text{host}}(t)}{dt} &= -\lambda_I I_{\text{host}}(t). && \text{(Incumbent/resistant cells, host)} \end{aligned} \quad (23)$$

548 All donor-derived cells are assumed to be displaceable and obey the same kinetics as displaceable  
549 host-derived cells. We solved eqns. 23 to obtain total memory cell numbers  $M_{\text{total}}(t) = M_{\text{donor}}(t) +$   
550  $M_{\text{host}}(t) + I_{\text{host}}(t)$ , and the normalised chimerism in memory,

$$\chi_{\text{M, norm}}(t) = \frac{1}{\chi_{\text{DP1}}} \frac{M_{\text{donor}}(t)}{M_{\text{total}}(t)}. \quad (24)$$

551 For simplicity we assumed that resistant memory cells were stable in number ( $\lambda_I = 0$ ). The  
552 incumbent model then has four free parameters ( $M_{\text{total}}(t_0)$ ,  $I_{\text{host}}(t_0)$ ,  $\varphi$ ,  $\lambda$ ). Multiple ages at BMT were  
553 handled as described for the homogeneous model.

## 554 Parameter estimation and model selection

Each model (with its parameter set denoted  $\beta$ ) was fitted simultaneously to the timecourses of total memory cell numbers  $M_i$  and the normalised chimerism  $\chi_{\text{norm},i}$ ,  $i = 1 \dots n$ , for a given source population (naive/ $T_{\text{CM}}$ ) and environment (dirty/clean). Cell numbers and chimerism values were log- and arcsin-square root-transformed, respectively, such that these new variables (denoted  $x$  and  $y$ ) could be assumed to have normally distributed errors with constant variances  $\sigma_x^2$  and  $\sigma_y^2$ . We then maximised the joint likelihood of  $x$  and  $y$  with respect to the model parameters  $\beta$ , and the unknowns  $\sigma_x$  and  $\sigma_y$ . If  $X_i(\beta)$  and  $Y_i(\beta)$  are the model predictions of the transformed observations  $x_i$  and  $y_i$  respectively, this likelihood is

$$\begin{aligned} \mathcal{L} &= \prod_i^n \frac{1}{\sqrt{2\pi}\sigma_x} \exp\left(-\frac{(x_i - X_i)^2}{2\sigma_x^2}\right) \times \prod_j^n \frac{1}{\sqrt{2\pi}\sigma_y} \exp\left(-\frac{(y_j - Y_j)^2}{2\sigma_y^2}\right) \\ &= \frac{\exp(-\text{SSR}_x/2\sigma_x^2)}{(\sqrt{2\pi}\sigma_x)^n} \times \frac{\exp(-\text{SSR}_y/2\sigma_y^2)}{(\sqrt{2\pi}\sigma_y)^n}, \end{aligned} \quad (25)$$

555 where SSR denotes the sum of squared residuals, and both  $\text{SSR}_x$  and  $\text{SSR}_y$  are functions of the  
556 parameters  $\beta$ . The log-likelihood is then

$$\ln \mathcal{L} = -n \ln(\sqrt{2\pi}\sigma_x) - n \ln(\sqrt{2\pi}\sigma_y) - \frac{\text{SSR}_x}{2\sigma_x^2} - \frac{\text{SSR}_y}{2\sigma_y^2}. \quad (26)$$

557 To reduce the number of unknowns to be estimated with a parameter search, we substituted the  
558 maximum likelihood estimates of the error variances, which can be calculated directly;

$$\frac{\partial \ln \mathcal{L}}{\partial \sigma_x} = -\frac{n}{\sigma_x} + \frac{\text{SSR}_x}{\sigma_x^3} = 0 \implies \hat{\sigma}_x^2 = \frac{\text{SSR}_x}{n},$$

559 (and similarly for  $\hat{\sigma}_y$ ), giving the following expression for the joint log-likelihood,

$$\ln \mathcal{L} = -\frac{n}{2} \ln(\text{SSR}_x \times \text{SSR}_y) - 2n. \quad (27)$$

560 This quantity was then maximised with respect to the parameters  $\beta$  using the `scipy.optimize`  
561 package in Python. We used the best-fitting model predictions to estimate 95% confidence intervals  
562 on parameters by bootstrapping residuals 1000 times, re-fitting and taking the 2.5% and 97.5%  
563 quantiles of the resulting distributions of parameter estimates.

564 For each model and source we performed the above procedure separately for data from the  
565 clean and dirty environments, and calculated a combined, maximum log likelihood  $\ln \mathcal{L}_{\text{combined}} =$   
566  $\ln \mathcal{L}_{\text{clean}} + \ln \mathcal{L}_{\text{dirty}}$ . We then used the corrected Akaike Information Criterion, AICc (**Akaike, 1974;**  
567 **Burnham and Anderson, 2002**) to assess the relative support for each model/source pairing, where

$$\text{AICc} = -2 \ln \mathcal{L}_{\text{combined}} + 2K + \frac{2K(K+1)}{N-K-1}. \quad (28)$$

568 Here  $K$  is the total number of estimated parameters, which was double the number of parameters  
569 in each model (one set for clean and another for dirty); and  $N$  is the total number of observations,  
570 which was  $2 \times$  the number of mice in the clean facility +  $2 \times$  the number in the dirty facility  
571 (each mouse yielded two measurements for each memory subset – total cell numbers, and donor  
572 chimerism).

573 Annotated code and data for performing all analyses are freely available from  
574 <https://github.com/marianowicka/memory-CD4-and-dirt.git>.

## 575 Acknowledgments

576 This work was supported by the NIH (R01 AI093870) and the Medical Research Council (MC-PC-  
577 13055). We would like to thank Fiona Powrie and the Oxford Centre for Microbiome Studies for  
578 germ free mice.



## References

- 579  
580 **Akaike H.** A new look at the statistical model identification. *IEEE Transactions on Automatic Control*. 1974;  
581 19(6):716–723.
- 582 **Beura LK**, Hamilton SE, Bi K, Schenkel JM, Odumade OA, Casey KA, Thompson EA, Fraser KA, Rosato PC,  
583 Filali-Mouhim A, Sekaly RP, Jenkins MK, Vezys V, Haining WN, Jameson SC, Masopust D. Normalizing the  
584 environment recapitulates adult human immune traits in laboratory mice. *Nature*. 2016 Apr; 532(7600):512–6.  
585 doi: 10.1038/nature17655.
- 586 **Burnham KP**, Anderson DR. *Model Selection and Multimodel Inference*. Second ed. Springer; 2002.
- 587 **Farber DL.** T cell memory: heterogeneity and mechanisms. *Clinical Immunology*. 2000; 95(3):173–181.
- 588 **Ganusov VV**, Borghans JAM, De Boer RJ. Explicit kinetic heterogeneity: mathematical models for interpretation  
589 of deuterium labeling of heterogeneous cell populations. *PLoS Comput Biol*. 2010; 6(2):e1000666.
- 590 **Gossel G**, Hogan T, Cownden D, Seddon B, Yates AJ. Memory CD4 T cell subsets are kinetically heterogeneous  
591 and replenished from naive T cells at high levels. *Elife*. 2017; 6:e23013.
- 592 **Gourley TS**, Wherry EJ, Masopust D, Ahmed R. Generation and maintenance of immunological memory. In:  
593 *Seminars in Immunology*, vol. 16(5) Elsevier; 2004. p. 323–333.
- 594 **Hogan T**, Yates A, Seddon B. Analysing temporal dynamics of T cell division *in vivo* using Ki67 and BrdU  
595 co-labelling by flow cytometry. *Bio-protocol*. 2017; 7(24).
- 596 **Hogan T**, Yates A, Seddon B. Generation of Busulfan chimeric mice for the analysis of T cell population dynamics.  
597 *Bio-protocol*. 2017; 4(24).
- 598 **Hogan T**, Gossel G, Yates AJ, Seddon B. Temporal fate mapping reveals age-linked heterogeneity in naive T  
599 lymphocytes in mice. *Proceedings of the National Academy of Sciences*. 2015; 112(50):E6917–E6926.
- 600 **Jameson SC**, Masopust D. Diversity in T cell memory: an embarrassment of riches. *Immunity*. 2009; 31(6):859–  
601 871.
- 602 **Jameson SC**, Masopust D. Understanding Subset Diversity in T Cell Memory. *Immunity*. 2018 02; 48(2):214–226.
- 603 **Kaech SM**, Wherry EJ. Heterogeneity and cell-fate decisions in effector and memory CD8+ T cell differentiation  
604 during viral infection. *Immunity*. 2007; 27(3):393–405.
- 605 **Kawabe T**, Jankovic D, Kawabe S, Huang Y, Lee PH, Yamane H, Zhu J, Sher A, Germain RN, Paul WE. Memory-  
606 phenotype CD4+ T cells spontaneously generated under steady state conditions exert innate Th1-like effector  
607 function. *Science Immunology*. 2017; 2(12).
- 608 **Kotani M**, Hirata K, Ogawa S, Habiro K, Ishida Y, Tanuma S, Horai R, Iwakura Y, Kishimoto H, Abe R. CD28-  
609 dependent differentiation into the effector/memory phenotype is essential for induction of arthritis in  
610 interleukin-1 receptor antagonist-deficient mice. *Arthritis & Rheumatism*. 2006 Feb; 54(2):473–481.
- 611 **Lee YJ**, Jameson SC, Hogquist KA. Alternative memory in the CD8 T cell lineage. *Trends in Immunology*. 2011;  
612 32(2):50–56.
- 613 **Mandi JN**, Monteiro JP, Vriskoop N, Germain RN. T cell-positive selection uses self-ligand binding strength to  
614 optimize repertoire recognition of foreign antigens. *Immunity*. 2013; 38(2):263–274.
- 615 **Min B**, McHugh R, Sempowski GD, Mackall C, Foucras G, Paul WE. Neonates support lymphopenia-induced  
616 proliferation. *Immunity*. 2003 Jan; 18(1):131–140.
- 617 **Min B**, Paul WE. Endogenous proliferation: burst-like CD4 T cell proliferation in lymphopenic settings. In:  
618 *Seminars in Immunology*, vol. 17(3) Elsevier; 2005. p. 201–207.
- 619 **Moussion C**, Girard JP. Dendritic cells control lymphocyte entry to lymph nodes through high endothelial  
620 venules. *Nature*. 2011 Nov; 479(7374):542–546.
- 621 **Rane S**, Hogan T, Seddon B, Yates AJ. Age is not just a number: Naive T cells increase their ability to persist in  
622 the circulation over time. *PLoS Biol*. 2018 Apr; 16(4):e2003949. doi: 10.1371/journal.pbio.2003949.
- 623 **Seddon B**, Tomlinson P, Zamoyska R. Interleukin 7 and T cell receptor signals regulate homeostasis of CD4  
624 memory cells. *Nature Immunology*. 2003 Jul; 4(7):680–686.



- 625 **Sprent J**, Surh CD. Normal T cell homeostasis: the conversion of naive cells into memory-phenotype cells.  
626 *Nature Immunology*. 2011; 12(6):478.
- 627 **Vezyz V**, Yates A, Casey KA, Lanier G, Ahmed R, Antia R, Masopust D. Memory CD8 T-cell compartment grows in  
628 size with immunological experience. *Nature*. 2009; 457(7226):196–9.
- 629 **Webb LV**, Barbarulo A, Huysentruyt J, Vanden Berghe T, Takahashi N, Ley S, Vandenabeele P, Seddon B. Survival  
630 of Single Positive Thymocytes Depends upon Developmental Control of RIPK1 Kinase Signaling by the IKK  
631 Complex Independent of NF- $\kappa$ B. *Immunity*. 2019 Feb; 50(2):348–361.e4. doi: [10.1016/j.immuni.2019.01.004](https://doi.org/10.1016/j.immuni.2019.01.004).
- 632 **Wendland M**, Willenzon S, Kocks J, Davalos-Misslitz AC, Hammerschmidt SI, Schumann K, Kremmer E, Sixt M,  
633 Hoffmeyer A, Pabst O, Förster R. Lymph node T cell homeostasis relies on steady state homing of dendritic  
634 cells. *Immunity*. 2011 Dec; 35(6):945–957.
- 635 **Younes SA**, Punkosdy G, Caucheteux S, Chen T, Grossman Z, Paul WE. Memory phenotype CD4 T cells undergoing  
636 rapid, nonburst-like, cytokine-driven proliferation can be distinguished from antigen-experienced memory  
637 cells. *PLoS biology*. 2011; 9(10):e1001171.
- 638 **Zhang Z**, Li J, Zheng W, Zhao G, Zhang H, Wang X, Guo Y, Qin C, Shi Y. Peripheral Lymphoid Volume Expansion and  
639 Maintenance Are Controlled by Gut Microbiota via RALDH+ Dendritic Cells. *Immunity*. 2016 Feb; 44(2):330–342.

640 **Appendix 1**

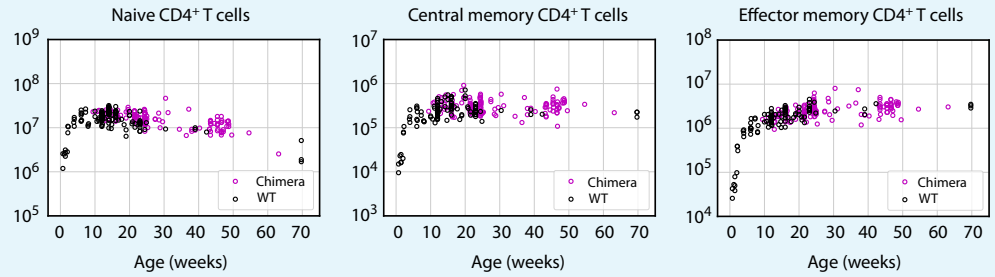

641

642

643

**Figure 1-figure supplement 1. Busulfan chimeric mice exhibit normal numbers of CD4<sup>+</sup> naive, central and effector memory T cells.**

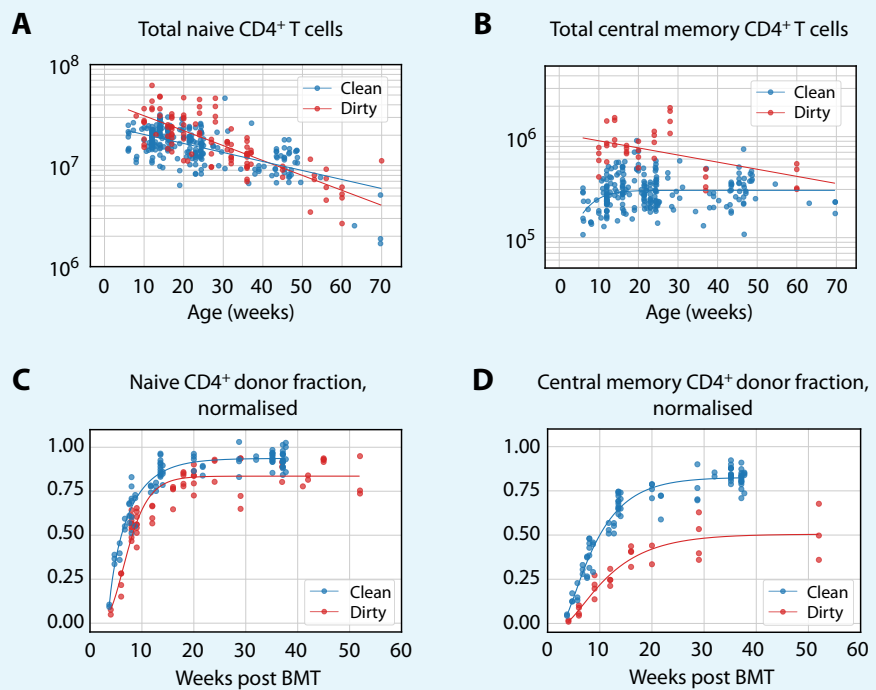

644

645

646

647

648

649

650

651

652

**Figure 1-figure supplement 2. Empirical descriptions of the size and chimerism of the putative source populations for CD4<sup>+</sup> T<sub>CM</sub> and T<sub>EM</sub> in adult mice. (A-B)** The timecourses of naive T cell numbers, and T<sub>CM</sub> numbers in dirty mice, were described with exponential decay ( $S(t) = S_{\max}e^{-rt}$ ); T<sub>CM</sub> numbers in clean mice (B) were described with  $S(t) = S_{\max}/(1 + e^{-rt}(S_{\max} - S_{\min})/S_{\min})$ . **(C-D)** Donor fraction (normalised chimerism) curves in CD4<sup>+</sup> naive T cells (C) and T<sub>CM</sub> (D) were described with the generalised logistic function  $\chi(t) = 1/(A + Be^{-rt})^{1/c}$  using the pooled data from mice at multiple ages post-BMT; curves specific to different ages at BMT were very similar.

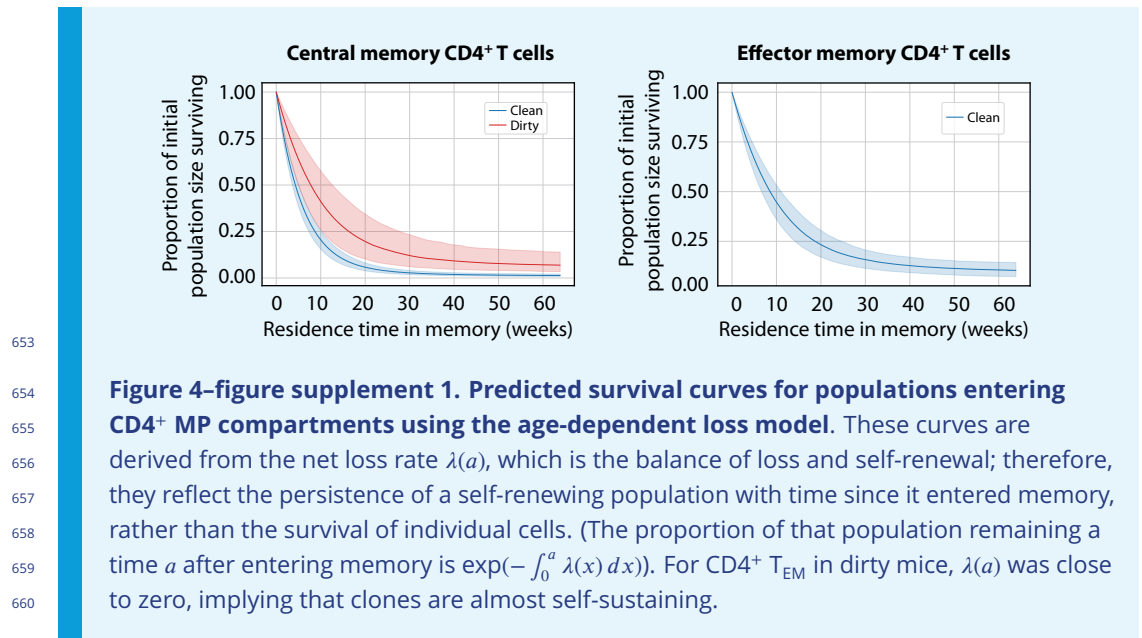

Source: https://www.biorxiv.org/content/10.1101/632281v3.full.pdf
